1 A two-pool mechanism of vesicle release in medial habenula  
2 terminals underlies GABA<sub>B</sub> receptor-mediated potentiation

3

4 Peter Koppensteiner<sup>1\*</sup>, Pradeep Bhandari<sup>1\*</sup>, Cihan Önal<sup>1\*</sup>, Carolina Borges-Merjane<sup>1,2</sup>, Elodie  
5 Le Monnier<sup>1</sup>, Yukihiro Nakamura<sup>3</sup>, Tetsushi Sadakata<sup>4</sup>, Makoto Sanbo<sup>5</sup>, Masumi Hirabayashi<sup>5</sup>,  
6 Nils Brose<sup>6</sup>, Peter Jonas<sup>1</sup>, Ryuichi Shigemoto<sup>1</sup>

7

8 Author affiliations: <sup>1</sup>Institute of Science and Technology Austria (ISTA), 3400 Klosterneuburg,  
9 Austria; <sup>2</sup>Present address: Biozentrum of the University of Basel, 4056 Basel, Switzerland;  
10 <sup>3</sup>Department of Pharmacology, Jikei University School of Medicine, Nishishinbashi, Minato-  
11 ku, Tokyo, 105-8461, Japan; <sup>4</sup>Advanced Scientific Research Leaders Development Unit,  
12 Gunma University Graduate School of Medicine, Maebashi, Gunma 371-8511, Japan;  
13 <sup>5</sup>Section of Mammalian Transgenesis, National Institute for Physiological Sciences, Okazaki,  
14 444-8585 Japan. <sup>6</sup>Department of Molecular Neurobiology, Max Planck Institute of  
15 Experimental Medicine, 37075 Göttingen, Germany

16

17 \*These authors contributed equally

18

19 Corresponding authors: Ryuichi Shigemoto, e-mail: [ryuichi.shigemoto@ist.ac.at](mailto:ryuichi.shigemoto@ist.ac.at)

20 Peter Koppensteiner, e-mail: [peter.koppensteiner@ist.ac.at](mailto:peter.koppensteiner@ist.ac.at)

21

22 **Abstract**

23 GABA<sub>B</sub> receptor (GBR) activation inhibits neurotransmitter release in axon terminals in the  
24 brain, except in medial habenula (MHb) terminals, which show robust potentiation. However,  
25 mechanisms underlying this enigmatic potentiation remain elusive. Here, we report that GBR  
26 activation induces a transition from tonic to phasic release accompanied by a 4-fold increase  
27 in readily releasable pool (RRP) size in MHb terminals, mirrored by a similar increase in the  
28 docked vesicle number at the presynaptic active zone (AZ). The tonic and phasic release  
29 vesicles have distinct coupling distances. We identified two vesicle-associated molecules,  
30 synaptoporin and CAPS2, selectively involved in tonic and phasic release, respectively.  
31 Synaptoporin mediates augmentation of tonic release and CAPS2 stabilizes readily releasable  
32 vesicles during phasic release. A newly developed “Flash and Freeze-fracture” method  
33 revealed selective recruitment of CAPS2 to the AZ during phasic release. Thus, we propose  
34 a novel two-pool mechanism underlying the GBR-mediated potentiation of release from MHb  
35 terminals.

36

## 37 Introduction

38 The synaptic connection from the medial habenula (MHb) to the interpeduncular  
39 nucleus (IPN) is a phylogenetically conserved pathway involved in emotion- and addiction-  
40 related behaviors<sup>1-4</sup>. The most striking peculiarity in this pathway is an enhancement of  
41 unparalleled scale of neurotransmitter release from terminals originating from cholinergic  
42 neurons in the ventral MHb by activation of presynaptic GABA<sub>B</sub> receptors (GBRs)<sup>4</sup>, usually  
43 inhibitory G-protein coupled receptors<sup>5</sup>. Except for an increase in presynaptic Ca<sup>2+</sup> influx, it is  
44 currently unknown which mechanisms mediate this increase in release. Another unique  
45 feature of the MHb-IPN synapse is the exclusive use of Cav2.3 for release<sup>1</sup>. However, Cav2.3-  
46 mediated release is not necessarily potentiated by GBR activation since it is inhibited in  
47 terminals originating in the dorsal MHb<sup>1,6</sup>.

48 Across the nervous system, synaptic terminals respond in either one of two  
49 fundamental ways to the repeated excitation at high frequency, facilitation of neurotransmitter  
50 release called tonic release, or depression of neurotransmitter release called phasic release<sup>7-  
51 9</sup>. While the depression of phasic release is mediated by a depletion of the readily releasable  
52 pool (RRP) of synaptic vesicles (SVs), the facilitation of tonic release is likely mediated by a  
53 progressive increase in release probability (P<sub>r</sub>) by residual Ca<sup>2+</sup><sup>7,10</sup>. Although the molecular  
54 properties determining the release modes in which a certain synapse type operates are  
55 incompletely understood, relevant factors include Ca<sup>2+</sup> influx, stimulation frequency and the  
56 priming and docking states of SVs<sup>7-9,11</sup>.

57 Here, we report that, following GBR activation, MHb terminals transition from a  
58 facilitating, tonic to a depressing, phasic neurotransmitter release mode at a physiological  
59 stimulation frequency. This transition is induced by a GBR-mediated increase in Ca<sup>2+</sup> influx,  
60 which recruits additional SVs to the RRP. Using “Flash and Freeze” in acute IPN slices, we  
61 observed an increase in docked SVs following GBR activation to the same extent as the  
62 increase in RRP size. We screened SV-associated proteins expressed in MHb neurons and  
63 found synaptoporin and CAPS2 selectively involved in tonic and phasic release, augmenting

64 release and retaining readily releasable SVs, respectively. Using a new method for nanoscale  
65 visualization of membrane-associated proteins within milliseconds after exocytosis, named  
66 “Flash and Freeze-fracture”, we discovered CAPS2 recruitment to the presynaptic active zone  
67 (AZ) and its stabilization there during phasic release.

68

## 69 **Results**

### 70 **Transition from tonic to phasic neurotransmitter release by GBR activation**

71 Rodent MHb neurons are active at ~10 Hz *in vivo*<sup>12-14</sup> but postsynaptic responses in  
72 IPN neurons following repetitive stimulation of MHb axons at this physiological frequency have  
73 never been studied. Therefore, we recorded rostral/central IPN neurons in whole-cell mode  
74 and measured excitatory postsynaptic currents (EPSCs) evoked by electrical stimulation of  
75 the fasciculus retroflexus (FR), a fiber bundle arising in the habenula. In order to keep the  
76 MHb-IPN pathway intact, we prepared 1 mm-thick angled slices as described previously<sup>1</sup> (Fig.  
77 1A). Under baseline conditions, 10-Hz stimulation for three seconds produced EPSC  
78 responses that increased in amplitude with consecutive stimuli (Fig. 1B). Application of the  
79 GBR agonist R(+)-baclofen (1  $\mu$ M) greatly potentiated initial EPSC amplitudes in the 10-Hz  
80 train but continued stimulation progressively reduced subsequent EPSC amplitudes (Fig. 1B-  
81 D). Normalization of EPSC amplitudes to the corresponding first baseline EPSC revealed that  
82 the enhanced EPSC amplitudes by baclofen decayed to the level of the facilitated baseline  
83 EPSC amplitudes (Fig. 1D). This implies that GBR-mediated depressing neurotransmission  
84 occurred in addition to and not instead of the baseline facilitating release. Thus, MHb terminals  
85 exhibited a facilitating, tonic neurotransmitter release pattern under baseline conditions and  
86 transitioned to a depressing, phasic release pattern after GBR activation.

87 Ventral MHb terminals co-release glutamate and acetylcholine<sup>15</sup>, therefore, we tested  
88 whether the tonic and phasic release are selectively mediated by one of the two transmitters.  
89 Cholinergic EPSC trains in the presence of the AMPA receptor blocker DNQX (10  $\mu$ M) still

90 transitioned to a phasic response pattern after GBR activation (Extended Data Fig. 1A) similar  
91 to that of glutamatergic EPSC trains in the presence of cholinergic blockers (50  $\mu\text{M}$   
92 hexamethonium, 5  $\mu\text{M}$  mecamylamine) (Extended Data Fig. 1B). Although the cholinergic  
93 RRP size ( $0.72 \pm 0.18$  nA,  $n=8$ ) was much smaller than the glutamatergic one ( $3.57 \pm 0.47$   
94 nA,  $n=8$ ; Extended Data Fig. 1C), cholinergic  $P_r$  was not significantly different from that of  
95 glutamatergic neurotransmission (Extended Data Fig. 1C). Thus, the GBR-mediated phasic  
96 release induction equally affects cholinergic and glutamatergic release, though glutamate  
97 mainly contributes to the EPSCs.

98 We then quantified the recovery from activity-dependent modulations of tonic and  
99 phasic release (Fig. 1E, F). The facilitated baseline responses decayed exponentially with a  
100 tau of 9.1 s (Fig. 1G), suggesting that this facilitation is augmentation<sup>16</sup>. Similarly, depression  
101 of phasic release recovered with a tau of 4.4 s, suggesting that the EPSC decrease results  
102 from RRP depletion. In conclusion, the two modes of neurotransmitter release from MHb  
103 terminals exhibit distinct short-term plasticity and recover from the activity-dependent  
104 modulation within seconds.

### 105 **Role of presynaptic $\text{Ca}^{2+}$ in the GBR-mediated enhancement of neurotransmitter release**

106 We next explored the role of presynaptic  $\text{Ca}^{2+}$  in the GBR-mediated transition from  
107 tonic to phasic release. Using AAV injections into the MHb of ChAT-IRES-Cre mice, we  
108 expressed axon-GCaMP6s in cholinergic neurons. FR stimulation at 10 Hz for three seconds  
109 increased presynaptic GCaMP fluorescence in the IPN  $4.0 \pm 0.6$  fold of resting fluorescence  
110 intensity whereas application of baclofen further increased it  $6.5 \pm 0.9$  fold ( $n=5$  slices, 5 mice;  
111 Fig. 2A, B). However, presynaptic GBRs are known to inhibit the influx of  $\text{Ca}^{2+}$  through voltage-  
112 gated  $\text{Ca}^{2+}$  channels (VGCCs) and no report shows direct GBR-mediated increases in  $\text{Ca}^{2+}$   
113 influx for any VGCCs in reconstituted systems<sup>5</sup>. Using simulations based on our  $\text{Ca}^{2+}$  imaging  
114 data, we asked whether the increase in presynaptic  $\text{Ca}^{2+}$  could stem from the inhibition of the  
115  $\text{Ca}^{2+}$ -binding ability of a buffer, resulting in an “un-buffering” of presynaptic  $\text{Ca}^{2+}$ , rather than  
116 enhanced  $\text{Ca}^{2+}$  influx (Extended Data Fig. 2, Extended Data Table 1). Analysis of response

117 kinetics of our experimental GCaMP data revealed significantly faster rise times after baclofen  
118 application with no change in decay times (Extended Data Fig. 2A–D). Using GCaMP6s as a  
119 model buffer, we simulated  $\text{Ca}^{2+}$  response kinetics at distinct buffer concentrations and found  
120 that high concentrations of a high-affinity  $\text{Ca}^{2+}$  buffer resulted in significantly prolonged decay  
121 times and lower peak fluorescence (Extended Data Fig. 2E–H), ruling out  $\text{Ca}^{2+}$  un-buffering  
122 as the GBR-mediated mechanism. Furthermore, alterations in  $\text{Ca}^{2+}$  extrusion also failed to  
123 reproduce the observed changes in GCaMP fluorescence after baclofen (Extended Data Fig.  
124 2I, J). Finally, we simulated alterations in  $\text{Ca}^{2+}$  influx and found that a 2.3-fold increase in  $\text{Ca}^{2+}$   
125 influx most closely reproduced our observed increase in GCaMP peak fluorescence after  
126 baclofen (Extended Data Fig. 2K–M).

127         Since our simulation confirmed increased  $\text{Ca}^{2+}$  influx as the cause of the GBR-  
128 mediated increase in presynaptic GCaMP fluorescence, we next tested whether increasing  
129  $\text{Ca}^{2+}$  influx by other means was sufficient to induce phasic release. Surprisingly, elevation of  
130 extracellular  $\text{Ca}^{2+}$  from 2.5 to 5 mM or addition of the voltage-gated  $\text{K}^+$  channel blockers  
131 tetraethylammonium chloride (TEA-Cl, 1 mM) and 4-aminopyridine (4-AP, 100  $\mu\text{M}$ ) neither  
132 induced phasic release nor occluded its induction by baclofen (Fig. 2C–H). Although TEA/4-  
133 AP application strongly enhanced spontaneous neurotransmitter release, evoked EPSC  
134 responses remained tonic and exhibited augmentation (Fig. 2F–H). Thus, we conclude that  
135 increasing  $\text{Ca}^{2+}$  influx alone is insufficient to induce phasic release.

136         We next hypothesized that increased  $\text{Ca}^{2+}$  influx during phasic release might result in  
137 diffusion of  $\text{Ca}^{2+}$  further away from the  $\text{Ca}^{2+}$  channel to recruit SVs more distant from the AZ  
138 compared to those for baseline tonic release. Therefore, we tested the effect of a slow  $\text{Ca}^{2+}$   
139 buffer, EGTA-AM (100  $\mu\text{M}$ ), on phasic release, first applied after baclofen (Fig. 2I). EGTA-AM  
140 selectively reduced the EPSC amplitudes of early responses in the 10-Hz train but the phasic  
141 release pattern remained similar (Fig 2J). Specifically, EGTA-AM reduced the first EPSC  
142 ( $\text{EPSC}_1$ ) amplitude on average by  $51.8 \pm 2.1\%$  ( $n=8$ , 4 mice), suggesting that the phasic  
143 release is loosely coupled to  $\text{Cav}2.3^{17}$ . In contrast, EGTA-AM had no significant effect on

144 baseline EPSC<sub>1</sub> amplitudes (Fig. 2L-N), suggesting tight coupling for SVs participating in tonic  
145 release. Most strikingly, however, EGTA-AM completely blocked the potentiation of EPSC<sub>1</sub>  
146 amplitudes when applied before baclofen (Fig. 2L-N), suggesting that the induction of phasic  
147 release strongly depends on Ca<sup>2+</sup> distant from Cav2.3. Although the exact presynaptic  
148 concentration of EGTA is unknown in EGTA-AM experiments, it is unlikely that presynaptic  
149 EGTA concentrations differed between tonic and phasic release since no modulation of  
150 endogenous esterase activity by GBRs has been known. Therefore, these results support our  
151 hypothesis that diffusion of Ca<sup>2+</sup> away from Ca<sup>2+</sup> channels recruits loosely-coupled SVs to the  
152 RRP of phasic release.

153 In summary, our results suggest that 1) activation of GBRs on MHb terminals induces  
154 an increase in Ca<sup>2+</sup> influx; 2) this Ca<sup>2+</sup> increase is necessary for the recruitment of phasic SVs  
155 from distal sites of the terminal inducing phasic release; 3) however, increasing Ca<sup>2+</sup> influx  
156 alone is not sufficient to induce phasic release; 4) the tonic SVs are more tightly coupled to  
157 Cav2.3 than phasic SVs, indicating distinct release sites for these SVs.

### 158 **Comparison of release properties of tonic and phasic neurotransmission**

159 To determine whether GBR-mediated enhancement of release is ascribable to an  
160 increase in P<sub>r</sub>, RRP or both, we next compared release properties of basal and GBR-enhanced  
161 release by applying 30 stimulations at 100 Hz (Fig. 3A, B). Experiments were performed in the  
162 presence of 1 mM kynurenic acid (KA) to avoid AMPA receptor desensitization. The 100-Hz  
163 stimulation resulted in the depletion of baseline responses, allowing for the measurement of  
164 the tonic RRP in cumulative EPSC amplitude plots<sup>18</sup>. Strikingly, the application of baclofen  
165 increased the RRP on average 4.1-fold (Fig. 3C; baseline RRP: 0.58 ± 0.09 nA; baclofen RRP:  
166 2.37 ± 0.36 nA; n=16 recordings/4 mice). In addition, baclofen also increased P<sub>r</sub> on average  
167 2.0-fold (Fig. 3D; baseline: 0.086 ± 0.017; baclofen: 0.169 ± 0.024). Altogether, our functional  
168 data suggest that tonic and phasic release modes are mediated by two distinct SV pools with  
169 different RRP size and coupling tightness, potentially operating in parallel.

## 170 **Structural correlates of enhanced neurotransmitter release**

171 Our functional data indicated that phasic release is associated with a 4-fold increase  
172 in RRP size compared to basal tonic release (Fig. 3). The RRP is an electrophysiological  
173 property considered to be structurally reflected by docked SVs in the AZ<sup>19,20</sup>. To test this, we  
174 next used timed high-pressure freezing after optogenetic stimulation of MHb terminals in acute  
175 slices (“Flash and Freeze”<sup>21</sup>). First, we measured optogenetic responses in IPN neurons of  
176 ChAT-ChR2-EYFP mice<sup>15</sup> in 200- $\mu$ m thick coronal slices (Fig. 4A). In ChAT-ChR2-EYFP  
177 mice, we found that 90.2% of all asymmetrical synapses expressed channelrhodopsin2 in the  
178 rostral/central IPN region (Extended Data Fig. 3A). Under baseline condition, optogenetic  
179 stimulation at 10 Hz produced tonic-like EPSC responses that decayed over time after the 10-  
180 Hz train (Fig. 4A, B). However, in contrast to electrically-evoked EPSCs, the first baseline  
181 EPSC in the optogenetic train was frequently larger than the subsequent responses. This likely  
182 resulted from the desensitizing kinetics of channelrhodopsin which, upon activation from  
183 resting state, exhibits an initially larger conductance than during steady-state or repetitive  
184 activity<sup>22,23</sup>. Importantly, the application of baclofen induced phasic release, which rapidly  
185 depleted during the 10-Hz train and recovered within 10 seconds (Fig. 4A, B).

186 To distinguish tonic and phasic RRP, we chose to freeze MHb terminals at two time  
187 points in the presence of baclofen; 1) 100 ms after the 10-Hz stimulation (Depletion group) at  
188 which time point the phasic RRP should be mostly depleted, and 2) 10 s after the 10-Hz  
189 stimulation (Recovery group) at which time point the phasic RRP should have fully recovered  
190 (Fig. 4C, D). Control samples were prepared in the same way but without light stimulation or  
191 baclofen. Following freeze substitution, we extracted the rostral/central IPN region and  
192 prepared serial ultrathin sections (40 nm) for EM imaging (Extended Data Fig. 3B-C; Fig. 4E).  
193 We measured SV diameters and found no significant difference between groups (Control: 46.0  
194  $\pm$  1.7 nm, n=16 synapses, 3 mice; 2215 SVs measured; Depletion: 43.4  $\pm$  1.7 nm, n=18  
195 synapses, 3 mice, 2204 SVs measured; Recovery: 43.6  $\pm$  0.9 nm, n=18 synapses, 3 mice,  
196 2539 SVs measured; Fig. 4F). In a defined perimeter around the AZ (see Methods), we then



197 measured the distance from each SV's center to the nearest presynaptic membrane in 5–nm  
198 bins. SVs in direct contact with the presynaptic membrane or whose center was within 20–nm  
199 distance of the inner leaflet of the membrane were considered docked. In control samples, the  
200 peak bins of SVs were in close proximity of the AZ (20 – 40 nm from the membrane) without  
201 making contact, thus, considered as loosely-docked<sup>8</sup> (5<sup>th</sup> – 8<sup>th</sup> bins in Fig. 4G). The depletion  
202 group displayed lower absolute numbers of SVs, particularly at the loosely-docked bins. In  
203 contrast, terminals in the recovery group showed a strong increase in docked SVs (first four  
204 bins in Fig. 4G). Furthermore, the density of docked SVs in the recovery group ( $2.34 \pm 0.27$   
205 docked SVs /  $10^4 \text{ nm}^2$ ; n=18 terminals, 3 mice) increased 3.5-fold compared to the depletion  
206 group ( $0.67 \pm 0.15$  docked SVs /  $10^4 \text{ nm}^2$ ; n=18 terminals, 3 mice; Fig. 4H). The difference in  
207 docked SV densities between depletion and recovery groups was similar to the difference in  
208 RRP size between tonic and phasic release (4.1-fold, Fig. 3C), supporting that two distinct  
209 pools of SVs mainly contribute to each release mode.

## 210 **SV-associated molecules selectively involved in tonic and phasic release**

211 To test the two-pool mechanism hypothesis, we next aimed to identify vesicle-  
212 associated proteins selectively involved in tonic and phasic release. We first investigated the  
213 role of synaptoporin (SPO) based on its selective expression in ventral MHb neurons (Allen  
214 Brain Atlas). SPO is a vesicular membrane protein and a homologue of synaptophysin<sup>24</sup>, but  
215 its functional importance remains unknown<sup>25</sup>. In contrast to synaptophysin, SPO was found to  
216 co-precipitate with Cav2.3 in a brain-wide proteomics study<sup>26</sup>, suggesting that it may be  
217 relevant for neurotransmission in MHb terminals which exclusively rely on Cav2.3 for release<sup>1</sup>.  
218 Immunofluorescence revealed that SPO was expressed in axon-like structures in the  
219 rostral/central IPN subnuclei (Fig. 5A), and at the EM level, SPO-labeling was confirmed on  
220 SVs in the vast majority of MHb terminals (Fig. 5B, Extended Data Fig. 4A). We then generated  
221 SPO KO mice (see Method) and confirmed the specificity of immunolabeling (Fig. 5A). To test  
222 the functional role of SPO, we performed whole-cell recordings from IPN neurons in SPO KO  
223 mice (Fig. 5C–F). At baseline conditions, augmentation of tonic release appeared strongly

224 impaired compared to wild-type (WT) mice (Fig. 5D). In contrast, baclofen-induced phasic  
225 release did not appear different from that of WT and  $P_r$  of EPSC<sub>1</sub> remained unaltered (Fig. 5E,  
226  $F$ ; measured by linear regression analysis of cumulative EPSC amplitude plots). Although  
227 there was a significant effect of genotype on phasic  $P_r$  time course ( $F_{1, 690} = 7.599$ ,  $P = 0.006$ ,  
228 two-way ANOVA), Bonferroni post hoc test revealed no significant difference at any stimulation  
229 time point. These results suggest that SPO is a mediator of tonic release augmentation and  
230 thus, could be a molecular marker specific for tonic release SVs.

231         Phasic release requires the cytosolic  $Ca^{2+}$ -dependent activator protein for secretion  
232 (CAPS) in the hippocampus<sup>8,27</sup>. Although there are two CAPS isoforms, CAPS1 and CAPS2,  
233 only CAPS1 is required for fast, phasic neurotransmission in the hippocampus<sup>27</sup>, whereas  
234 CAPS2 was found to be involved in the release of neuropeptides and neurotrophic factors<sup>28,29</sup>.  
235 Since MHb neurons exclusively express CAPS2 but not CAPS1<sup>30</sup>, we hypothesized that  
236 CAPS2 might be involved in GBR-induced phasic release. Immunofluorescence revealed  
237 strong CAPS2 expression in all IPN subnuclei (Fig. 5G) and pre-embedding EM showed  
238 CAPS2 labeling on SVs in the vast majority of MHb terminals in the rostral/central IPN (Fig.  
239 5H, Extended Data Fig. 4B). Double immunofluorescence showed a large overlap of labeling  
240 for CAPS2 with that for SPO (Extended Data Fig. 4C). We then performed whole-cell  
241 recordings in CAPS2 KO<sup>27</sup> (Fig. 5I–L). Functionally, tonic release appeared intact, with  
242 augmentation similar to that of WT (Fig. 5I, J). However, phasic release was strikingly altered  
243 in CAPS2 KO mice (Fig. 5K, L). Specifically,  $P_r$  of EPSC<sub>1</sub> was reduced almost 10-fold  
244 compared to WT (WT EPSC<sub>1</sub>  $P_r$ :  $0.19 \pm 0.02$ ,  $n=13$ , 5 mice; CAPS2 KO EPSC<sub>1</sub>  $P_r$ :  $0.02 \pm 0.00$ ,  
245  $n=14$ , 3 mice, Fig. 5L). Furthermore,  $P_r$  increased over the first four stimuli before starting to  
246 reduce gradually. Interestingly, we observed similar phasic responses in WT mice but only at  
247 the very first 10-Hz stimulation in the presence of baclofen (Extended Data Fig. 5A, B).  
248 Therefore, these results suggest that CAPS2 is recruited  $Ca^{2+}$ -dependently during phasic  
249 release induction and might serve to stabilize replenished SVs in a docked state. Nonetheless,  
250 the facilitation in the first several stimuli followed by depression in CAPS2 KO mice (Fig. 5K,

251 L) indicates that CAPS2 does not interfere with the Ca<sup>2+</sup>-dependent recruitment of phasic  
252 release SVs. Overall, we identified SPO and CAPS2 as SV-associated proteins selectively  
253 involved in tonic and phasic release, respectively.

#### 254 **Activity-dependent induction and retention of phasic release**

255 Our results in CAPS2 KO mice suggest that CAPS2 is required for the retention of  
256 newly recruited SVs in the RRP, but previous activity is necessary for the potentiation of initial  
257 EPSCs in the train. Therefore, we tested whether achieving the maximal phasic response is  
258 activity-dependent or whether baclofen without activity is sufficient to reach peak potentiation.  
259 To this aim, we recorded bilateral MHb inputs to single IPN neurons and, after establishing a  
260 baseline response, stopped stimulation on one hemisphere while washing in baclofen (silent  
261 washin, Fig. 6A, B). Once the 10–Hz stimulation (3 s, every 20 s) on the other hemisphere  
262 induced maximal potentiation, the same 10–Hz stimulation of the silent side resumed (Fig.  
263 6B). Strikingly, EPSC<sub>1</sub> amplitude in the first 10–Hz stimulation train was only marginally  
264 increased whereas the second train exhibited maximal potentiation of EPSC<sub>1</sub> amplitude. This  
265 result confirmed that the induction of phasic release is activity-dependent.

266 Next, we asked whether the GBR-mediated potentiation, once induced, might be  
267 stored in the absence of GBR activation during periods of synaptic inactivity. To test this, we  
268 stimulated MHb inputs bilaterally to induce phasic release on both sides in the presence of  
269 baclofen. Once full potentiation was achieved, stimulation on one hemisphere was halted  
270 (silent washout) while starting the washout of baclofen (Fig. 6C). Five minutes after the  
271 washout onset, potentiation on the continuously stimulated side was fully reverted (stimulated  
272 washout). At this time point, we restarted the 10–Hz stimulation of the silent side and saw only  
273 marginal potentiation of EPSC<sub>1</sub> amplitudes in the first train (EPSC<sub>1</sub>: 213.2 ± 62.3% of baseline  
274 amplitude, n=9, 4 mice; Fig. 6C). However, in the second train, EPSC<sub>1</sub> amplitudes increased  
275 to 46.8% of the peak potentiation (second train EPSC<sub>1</sub>: 374.7 ± 82.8% of baseline amplitude;  
276 peak potentiation EPSC<sub>1</sub>: 801.6 ± 120.4% of baseline amplitude). Therefore, we conclude that  
277 the GBR-mediated potentiation can be stored for minutes in the absence of GBR activation,

278 but the retrieval of this stored potentiation also requires activity, consistent with the idea of  
279  $\text{Ca}^{2+}$ -dependent recruitment of phasic release SVs.

## 280 **Recruitment of CAPS2 to the presynaptic active zone by phasic but not tonic release**

281         Given the partial storage of GBR-mediated potentiation for at least five minutes (Fig.  
282 6C), we hypothesized that chemical fixation might be sufficiently fast to capture molecular  
283 changes underlying the phasic release induction. Therefore, we next investigated the nano-  
284 anatomical location of CAPS2 inside MHb terminals during phasic release. We combined  
285 optogenetic stimulation of MHb terminals in acute IPN slices from ChAT-ChR2-EYFP mice  
286 and immersion chemical fixation followed by pre-embedding immunolabeling (“Flash and Fix”).  
287 Control slices remained unstimulated and unexposed to baclofen whereas the “10 Hz” group  
288 received three 10-Hz light stimulations (3 s duration, 10 s intervals) without baclofen and the  
289 “10 Hz + Baclofen” group received the same stimulation after a 10 – 15 min pre-incubation in  
290 1  $\mu\text{M}$  baclofen. Immediately after the last stimulation, slices were submerged in a fixative (4%  
291 PFA, 0.05% glutaraldehyde, 15% picric acid) for 45 min. Pre-embedding immunolabeling for  
292 CAPS2 revealed that CAPS2 was specifically recruited to the presynaptic AZ in the 10 Hz +  
293 Baclofen group (Fig. 7A, B; Control:  $0.3 \pm 0.1$  particles/AZ,  $n=58$  profiles, 2 mice; 10 Hz:  $0.7 \pm$   
294  $0.1$  particles/AZ,  $n=68$  profiles, 2 mice; 10 Hz + Baclofen:  $2.6 \pm 0.3$  particles/AZ,  $n=60$  profiles,  
295 2 mice). This result suggests the recruitment and subsequent stabilization of CAPS2 in the  
296 presynaptic AZ during the phasic, but not tonic, release.

## 297 **“Flash and Freeze-fracture” reveals selective recruitment of CAPS2 to the presynaptic** 298 **membrane during phasic release**

299         SVs containing SPO or bound by CAPS2 may selectively fuse with the AZ membrane  
300 during tonic and phasic release, respectively. However, it is unclear whether all SVs contain  
301 SPO and CAPS2 or whether tonic and phasic pools are molecularly non-overlapping. To  
302 answer this question, we combined “Flash and Freeze” with freeze-fracture replication and  
303 subsequent immunolabeling. This method, which we call “Flash and Freeze-fracture”, enables

304 the nanoscale detection of multiple proteins simultaneously in the presynaptic membrane  
305 within milliseconds of neurotransmitter release (Fig. 8A).

306 If CAPS2 is exclusively expressed on phasic and SPO exclusively on tonic SVs, then  
307 the ratio of CAPS2 to SPO molecules in the presynaptic membrane should shift towards  
308 CAPS2 during phasic release. In contrast, if all SVs contain CAPS2 and SPO, the ratio of  
309 CAPS2 to SPO molecules in the presynaptic membrane should remain unaltered between  
310 tonic and phasic release. Thus, we next quantified the ratio of CAPS2 to SPO in the  
311 presynaptic membrane following stimulation by a single 8 ms light pulse in the absence or  
312 presence of baclofen. Since phasic SV recruitment is activity-dependent (Extended Data Fig.  
313 5A and Fig. 6B), two 10-Hz conditioning stimuli (3-s duration, 10-s interval) were given 10 s  
314 prior to the single light pulse. Freezing was timed so that the tissue reached 0 °C 8 ms after  
315 light onset and light application continued for an additional 15 ms during freezing. To maximize  
316 release and stabilize SV- and membrane-associated proteins in the presynaptic membrane  
317 after fusion, slices were stimulated and frozen in the presence of 1 mM TEA-Cl, 100 μM 4-AP  
318 and 100 μM dynasore. Because CAPS2 is a cytosolic protein, we incubated replicas with  
319 attached tissue in 2% PFA for one hour prior to SDS digestion to crosslink CAPS2 to potential  
320 interacting transmembrane proteins. In “Flash and Freeze-fracture” replicas of “stimulation +  
321 baclofen” group, the ratio of CAPS2 to SPO ( $4.56 \pm 0.87$ , n=6 replicas, 205 profiles, 6 mice)  
322 was significantly higher than in the unstimulated control group (ACSF,  $0.31 \pm 0.01$ , n=3  
323 replicas, 153 profiles, 3 mice) and “stimulation” group ( $1.33 \pm 0.48$ , n=4 replicas, 320 profiles,  
324 4 mice; Fig. 8B, C). We confirmed the specificity of replica labeling for SPO and CAPS2 in  
325 acute-slice replicas of corresponding KO mice (Extended Data Fig. 6A). The difference in the  
326 ratio during phasic release derived from increases in the density of CAPS2 in the presynaptic  
327 membrane (Extended Data Fig. 6B) as SPO density was similar across all three groups  
328 (Extended Data Fig. 6B), potentially due to high spontaneous neurotransmission in the  
329 presence of TEA/4AP (Fig. 2F). Comparison of SPO and CAPS2 particle numbers in individual  
330 AZs revealed significant positive correlation in the “stimulation + baclofen” group but not the

331 “stimulation” group (Extended Data Fig. 6C), indicating that baclofen induced a correlated  
332 evoked vesicular release of SPO- and CAPS2-associated SVs, whereas release of these two  
333 populations was independent in the stimulation only condition. Although control samples also  
334 showed a significant correlation, this was likely caused by the frequent absence of CAPS2 in  
335 many of the control profiles. Finally, to test for association of SPO and CAPS2 in the AZ, we  
336 compared the nearest neighbor distances (NNDs) from CAPS2 to SPO particles with those  
337 from real CAPS2 to simulated SPO particles (see Methods). Interestingly, NND analysis  
338 revealed no significant association of CAPS2 and SPO in the presynaptic membrane of both  
339 “stimulation” and “stimulation + baclofen” groups (Extended Data Fig. 6D), suggesting that  
340 fusion sites of CAPS2- and SPO-associated vesicles may not overlap.

341

## 342 **Discussion**

343 We discovered that activation of GBRs induces a transition from tonic to phasic  
344 neurotransmitter release mode in MHb terminals, which coincides with robust potentiation and  
345 an increase in action potential-driven  $\text{Ca}^{2+}$  influx as previously reported<sup>3,4</sup>. During basal  
346 release, small  $\text{Ca}^{2+}$  influx triggers release of tonic SVs close to the VGCC without involving  
347 the distal phasic pool. Importantly, we found GBR-mediated recruitment of additional SVs from  
348 distal presynaptic regions, resulting in increases in RRP size and docked SVs. We identified  
349 SPO and CAPS2 as two SV-associated molecules selectively involved in tonic and phasic  
350 release, respectively. The recruitment of phasic release SVs is activity-dependent and their  
351 retention at the AZ is CAPS2-dependent. Strikingly, a newly developed “Flash and Freeze-  
352 fracture” method revealed selective transfer of CAPS2 to the presynaptic membrane during  
353 phasic release. Thereby, we propose a novel two-pool mechanism (Fig. 8D) underlying the  
354 unusual GBR-mediated potentiation of neurotransmitter release from MHb terminals.

355 To our knowledge, all currently known synapses release exclusively in a tonic or phasic  
356 manner at a given frequency<sup>8,9</sup>. The MHb terminal in the IPN is the only example capable of a  
357 rapid and reversible transition between tonic and phasic release modes at the same release

358 frequency. The combination of our functional and structural data indicates that the two modes  
359 co-exist in the same terminals with two distinct populations of SVs selectively involved in these  
360 two modes. First, the  $\text{Ca}^{2+}$  imaging of MHb terminals (Fig. 2A-B) showed increased  $\text{Ca}^{2+}$   
361 signals in all responsive axons but detected no new axons appearing after GBR activation,  
362 indicating that the same axons are involved in both tonic and phasic release. Second, “Flash  
363 & Freeze” revealed an increase in docked SVs in the vast majority of terminals after recovery  
364 from phasic release depletion, whereas the docked SV numbers were similarly low in the  
365 control and depletion conditions (Fig. 4H), indicating that single population of terminals  
366 increase docked SVs in phasic mode and depleted them to the same level as tonic mode.  
367 Third, “Flash & Freeze-fracture” showed that the increased CAPS2 labeling in the phasic mode  
368 (Stimulation + Baclofen) always co-localized with SPO labeling at the AZ (Fig. 8B-C, Extended  
369 Data Fig. 6C), indicating that the same terminals have CAPS2- and SPO-associated SVs.  
370 Fourth, SPO- and CAPS2-deficient mice have selective impairments in tonic and phasic  
371 release, respectively (Fig. 5), but the vast majority of MHb terminals were labeled for SPO and  
372 CAPS2 with a large overlap (Extended Data Fig. 4), indicating that tonic and phasic SVs co-  
373 exist in the same terminals. Fifth, tonic and phasic SVs have distinct coupling tightness,  
374 indicating different distances from Cav2.3 in the AZ. Sixth, “Flash & Freeze-fracture” showed  
375 a constant level of SPO at the AZ in the presence and absence of baclofen (Extended Data  
376 Fig. 6B), indicating GBR-independent release of SPO-associated SVs in both tonic and phasic  
377 modes, whereas the drastic increase in CAPS2 number (Fig. 7) and CAPS2/SPO ratio (Fig.  
378 8B-C) by baclofen indicates selective recruitment of CAPS2-associated SVs in the phasic  
379 mode. In addition, the positive correlation between SPO and CAPS2 numbers in each AZ in  
380 the presence but not the absence of baclofen (Extended Data Fig. 6C) suggests that evoked  
381 co-release of SPO- and CAPS2-associated SVs occurs only in phasic release. No significant  
382 co-localization of CAPS2 and SPO in the AZ membrane also supports separated fusion sites  
383 for the two SV populations. These results provide strong support for the two-pool mechanism  
384 with distinct SV populations, SPO- and CAPS2-associated ones mediating tonic and phasic  
385 release, respectively, in the same MHb terminals.

386 We interpret the convergence of tonic and phasic release to similar EPSC amplitudes  
387 (Fig. 1D) as an indicator of their parallel nature. However, this assumes that the phasic pool  
388 depletes completely, which is not described in other phasic synapses at low stimulation  
389 frequencies. On one hand, lack of complete depletion in other synapses might be caused by  
390 the presence of an “invisible” tonic component that is masked by the depressing phasic pool<sup>16</sup>.  
391 On the other hand, in addition to a parallel SV pool model, our results could also be interpreted  
392 according to a recently proposed two-step sequential docking model which categorizes SVs  
393 into different docking categories but draws them from a single, molecularly homogenous  
394 pool<sup>8,31,32</sup>. Under baseline conditions, the majority of SVs may be in a loosely docked state  
395 ( $SV_{LS}$ ) with only a small proportion SVs in a tightly docked, fusion-competent configuration  
396 ( $SV_{TS}$ ). With repeated stimulation, SVs may gradually transition  $Ca^{2+}$ -dependently from LS to  
397 TS to fusion until a steady-state is reached. Accordingly, baclofen may shift the resting ratio  
398 of LS/TS pools towards TS, resulting in a higher proportion of tightly docked SVs at rest.  
399 Although the starting pool ratios of LS/TS in tonic and phasic release are different, repeated  
400 stimulation in the presence of baclofen would still lead to the same steady-state as during tonic  
401 release, resulting in apparent conversion of facilitated tonic and depressed phasic EPSC  
402 amplitudes. According to the sequential model, the release pattern of the loosely-docked pool  
403 closely matches our partial phasic responses to the first repetitive stimulation in WT and those  
404 to all repetitive stimulations in CAPS2 KO. This could suggest that 1) SV transition from a  
405 loosely to a tightly docked state during phasic release induction and 2) CAPS2 mediates the  
406 tight docking required for the full phasic release. Importantly, however, a selective recruitment  
407 of CAPS2 to the AZ during phasic but not tonic release is difficult to explain with a molecularly  
408 homogenous SV pool from which all SVs are drawn. The distinct coupling distance of tonic  
409 and phasic SVs and no significant co-localization of SPO and CAPS2 in the AZ also favor the  
410 parallel model.

411 Unexpectedly, we identified SPO as a mediator of tonic release augmentation. Until  
412 now, no clear functional role of SPO has been described<sup>25</sup>. Synaptoporin (also called



413 synaptophysin 2) is a homologue of synaptophysin with several molecular distinctions, one of  
414 which is the direct binding to Cav2.3 R-type  $\text{Ca}^{2+}$  channels<sup>26</sup>. It is conceivable that the  
415 interaction of SPO with Cav2.3 in MHb terminals underlies the tighter coupling of tonic  
416 compared to phasic release vesicles. Furthermore, Cav2.3 might serve as an anchor point for  
417 tonic vesicles during augmentation and loss of this anchor might result in impaired recruitment  
418 of tonic vesicles to the AZ during tonic release.

419         Similar to SPO, the function of the cytosolic CAPS2 protein in fast neurotransmission  
420 has remained elusive. Although the more widely expressed CAPS1 is a known mediator of  
421 phasic release in the hippocampus, CAPS2 KO alone did not induce any alterations in fast  
422 neurotransmission<sup>27</sup>. Instead, CAPS2 was found to serve as a mediator of neuropeptide and  
423 neurotrophic factor release during development in other brain regions<sup>30,33</sup>. Therefore, we  
424 cannot rule out developmental alterations in MHb terminals of CAPS2 KO. The CAPS2  
425 function found in MHb terminals, which exclusively express CAPS2 isoform<sup>30</sup>, may be masked  
426 in other synapses expressing both CAPS1 and CAPS2. Approximately 40% of CAPS proteins  
427 elude in the membrane fraction in whole-brain lysates and synaptosomal preparations<sup>34</sup>,  
428 suggesting that they are often membrane-bound. Importantly, CAPS2 is also located on SVs  
429 in parallel fiber terminals in the cerebellum<sup>33</sup>. Thus, the recruitment of CAPS2 to the AZ we  
430 observed during phasic activity could result from the fusion of CAPS2-associated SVs,  
431 although we cannot rule out that cytosolic CAPS2 is recruited to the AZ by other mechanisms.  
432 Most strikingly, in WT MHb terminals, phasic release induction was activity-dependent, with  
433 the first repetitive stimulation showing a partial phasic response (Extended Data Fig. 5A) but  
434 inducing a fully potentiated response to the subsequent repetitive stimulation. In contrast, in  
435 CAPS2 KO mice, the repetitive stimulation induced the partial phasic response every time as  
436 if it were the first stimulation. These results suggest that phasic vesicles are activity-  
437 dependently recruited to the AZ and, upon fusion with the membrane, CAPS2 proteins  
438 associated with the fused vesicles remain at the fusion site, potentially via the  $\text{Ca}^{2+}$  binding  
439 C2 and the plexstrin homology (PH) domains<sup>35</sup>. The remaining CAPS2 at the AZ might serve

440 as docking sites for replenished vesicles via their Munc13 homology (MHD) and MUN  
441 domains<sup>35</sup>, resulting in an increase in the RRP. Contrary to this hypothesis, a previous study  
442 in CAPS1/2-deficient hippocampal cultured neurons found that the PH but not the MUN  
443 domain was required for CAPS2-mediated RRP recruitment<sup>36</sup>. In the CAPS2 KO, phasic  
444 vesicles have to be recruited to the AZ “from scratch” at every stimulus train, which may be  
445 interpreted as synaptic short-term memory loss of prior activity and thus, CAPS2 might be  
446 viewed as an engram molecule<sup>37</sup>.

447 Our results suggest that the same somatic firing pattern in the MHb *in vivo* may  
448 produce two distinct output signals from IPN neurons. Specifically, phasic release likely  
449 induces short-duration burst firing in IPN neurons followed by periods of silence, whereas tonic  
450 release may produce prolonged, uninterrupted firing. A main IPN projection target is the  
451 median raphe nucleus (MRN)<sup>38-40</sup>, a serotonergic center that modulates a multitude of  
452 forebrain functions<sup>41</sup>. Interestingly, tonic excitation of MRN neurons via the IPN is  
453 hypothesized to disrupt hippocampal theta oscillation through MRN-derived serotonergic  
454 innervation<sup>42</sup>. In addition, high-frequency firing GABAergic MRN neurons have been shown to  
455 be active in either tonic or phasic rhythms<sup>43</sup>. Similarly, the IPN also projects to the lateral  
456 habenula neurons<sup>40</sup> which exhibit a tonic excitation and phasic inhibition patterns during  
457 motivation-related behaviors<sup>44</sup>. Interestingly, downregulation of CAPS2 in MHb neurons  
458 induces depression-like phenotypes in mice<sup>45</sup>. Thus, tonic and phasic IPN output patterns  
459 might modulate forebrain serotonergic signaling through control of raphe activity as well as  
460 motivational states through lateral habenula projections.

461 Furthermore, activation of GBRs on MHb terminals might selectively strengthen inputs  
462 from low-frequency (1 Hz) firing cells, as terminals of high frequency (10 Hz) firing MHb cells  
463 might rapidly revert to basal release strength following RRP depletion. What could be the  
464 source of GABA for the transition to phasic release? Since the vast majority of IPN neurons  
465 are GABAergic and innervate each other together with MHb-derived cholinergic inputs<sup>46,47</sup>,  
466 local GABA release from presynaptic or postsynaptic IPN neurons<sup>3</sup> might regulate their MHb-

467 driven output through the activation of presynaptic GBRs. Although the trigger for retrograde  
468 GABA release is unknown, a coincidence detection mechanism may be envisioned where  
469 secondary excitatory projections to the IPN<sup>48</sup> raise ambient GABA concentrations high enough  
470 to activate GBRs on MHb terminals.

471 The surprising two-pool mechanism we discovered raises several questions: Which  
472 factors retain CAPS2 in the AZ during phasic release? What is the exact reason for the  
473 increased influx of Ca<sup>2+</sup> during GBR activation? What is the GBR-mediated signaling  
474 mechanism necessary for the phasic release induction other than the Ca<sup>2+</sup> increase? Future  
475 studies will be necessary to answer these questions. Overall, our study provides new insights  
476 into the mechanisms underlying the unusual potentiation of release by GBRs from MHb  
477 terminals and opens up a new regime of presynaptic modulation.

478

## 479 **Materials and Methods**

### 480 **Animals**

481 Wild-type C57BL6J (#000664), heterozygous ChAT-ChR2-EYFP (#014546) and  
482 heterozygous ChAT-IRES-Cre (#006410) mice were purchased from Jackson Laboratory.  
483 Homozygous CAPS2 KO mice were generated as previously described<sup>27</sup>. Synaptopodin  
484 (MGI:1919253) KO mice were generated using the CRISPR-Cas9 method with  
485 AAGTACCGCGAAAACAACCGGGG as a guide RNA target sequence. The single-guide RNA  
486 and Cas9 protein were co-injected into fertilized oocytes, collected from superovulated  
487 C57BL/6J female mice mated with male mice. All the surviving zygotes were transferred into  
488 oviductal ampullae of pseudopregnant recipient mice. To determine the genotype of pups,  
489 genomic DNA was extracted from ear tissues, and screened by PCR analysis and subsequent  
490 direct sequencing analyses. A homozygous 2-bp deletion at amino acid position 130 resulted  
491 in a STOP codon at amino acid position 136, which corresponds to the start of the third  
492 transmembrane domain<sup>49</sup>. Male and female mice were used indiscriminately in all

493 experiments. Mice were bred and maintained at the preclinical facility at Institute of Science  
494 and Technology Austria on a 12h light/dark cycle with access to food and water *ad libitum*. All  
495 experiments were performed in strict accordance with the license approved by the Austrian  
496 Federal Ministry of Science and Research (Animal license number: BMWFW-66.018/0012-  
497 WF/V/3b/2016) and Austrian and EU animal laws.

498

## 499 **Electrophysiology**

500 Mice (6 – 12 weeks of age) were deeply anesthetized via intraperitoneal (i.p.) injection  
501 of ketamine (90 mg/kg) and xylazine (4.5 mg/kg), followed by transcardial perfusion with ice-  
502 cold, oxygenated (95% O<sub>2</sub>, 5% CO<sub>2</sub>) artificial cerebrospinal fluid (ACSF) containing (in mM):  
503 118 NaCl, 2.5 KCl, 1.25 NaH<sub>2</sub>PO<sub>4</sub>, 1.5 MgSO<sub>4</sub>, 1 CaCl<sub>2</sub>, 10 Glucose, 3 Myo-inositol, 30  
504 Sucrose, 30 NaHCO<sub>3</sub>; pH = 7.4. As described previously <sup>1</sup>, the brain was rapidly excised and  
505 a single, 52–54° angled slice of 1 mm thickness containing the whole MHb to IPN pathway  
506 was cut using a Pro7 Linear Slicer (Dosaka, Kyoto, Japan). Slices were left to recover for 20  
507 min at 35°C, followed by a slow cool down to room temperature (RT, 22.5 – 24.0 °C) over 40  
508 – 60 min. After recovery, the slice was transferred to the recording chamber and superfused  
509 with ACSF containing 2.5 mM CaCl<sub>2</sub> and 20 μM bicuculline methiodide (Tocris, Bristol, UK) at  
510 a rate of 3 – 4 ml/min at RT. Glass pipettes (B150-86-10, Sutter Instrument, Novato, CA, USA)  
511 with resistances of 3 – 4 MΩ were crafted using a P1000 horizontal pipette puller (Sutter  
512 Instrument) and filled with internal solution containing (in mM): 130 K-Gluconate, 10 KCl, 2  
513 MgCl<sub>2</sub>, 2 MgATP, 0.2 NaGTP, 0.5 EGTA, 10 HEPES, 5 QX314-Cl; pH 7.4 adjusted with KOH.  
514 Neurons of the rostral and central IPN were visually identified using an infrared differential  
515 interference contrast video system in a BX51 microscope (Olympus, Tokyo, Japan). Electrical  
516 signals were acquired at 20 – 50 kHz and filtered at 4 kHz using a Multiclamp 700B amplifier  
517 connected to a Digidata 1440A digitizer (Molecular Devices, San Jose, CA, USA) with  
518 pClamp10 software (Molecular Devices). Stimulating electrodes (CBBPC75, FHC, Bowdoin,  
519 ME) were placed bilaterally on the fasciculus retroflexus and electrical stimulation (10 Hz, 3

520 seconds, 0.2 ms pulse duration, 0.5 – 2.5 V stimulation intensity) of left or right habenular axon  
521 fiber tracts was applied via a stimulus isolator (AMPI, Jerusalem, Israel). Neurons were  
522 voltage-clamped at –60 mV in whole-cell mode. Recordings with access resistances  
523 exceeding 20 M $\Omega$  or with changes in access resistance or holding current by more than 20%  
524 were discarded. Access resistance was not compensated. At each sweep, left and right fiber  
525 tracts were stimulated separately with 5-s intervals and inter-sweep intervals of 20 s. Left-  
526 and right-side derived EPSC responses were treated as individual recordings, meaning that  
527 one whole-cell recording of one IPN neuron receiving two independently stimulated inputs  
528 would yield  $n = 2$ . Tonic and phasic release traces were analyzed after averaging the  
529 responses of 5 – 10 sweeps. EPSC amplitudes were measured as the maximal negative  
530 current deflection between two stimulation artifacts (or within 100 ms in case of the last  
531 stimulus). For time course measurements of recovery from augmentation and depletion, the  
532 left or right fasciculus retroflexus was stimulated in separate recordings at 10 Hz for 3 s  
533 followed by a single stimulus at intervals from 0.5 – 13.3 s. To calculate RRP size and  $P_r$  using  
534 cumulative EPSC amplitudes, a linear correlation was fit through the last six points of the  
535 cumulative EPSC amplitude plot (stimulus #25 – stimulus #30) and the projected value of the  
536 line at  $x=1$  was considered the RRP size ( $I_{RRP}$ ). Release probability was calculated as  $P_r =$   
537  $\frac{I_{EPSC}}{I_{RRP}}$ . At 100-Hz trains, the latency of the first baseline EPSC often exceeded the stimulation  
538 interval (10 ms) and, therefore,  $I_{EPSC1}$  under baseline and baclofen conditions was obtained  
539 from separately recorded 10-Hz trains in the same cell. In EGTA-AM experiments, 10 – 15 ml  
540 of ACSF containing 100  $\mu$ M EGTA-AM were recycled continuously over the course of the  
541 application and only one cell per slice was recorded. To record optogenetically-evoked  
542 EPSCs, 200- $\mu$ m thick coronal sections of ChAT-ChR2-EYFP mice were cut and light was  
543 applied via a pE-300 LED light source (CoolLED, Andover, UK) through the objective at 10 –  
544 20 mW/cm<sup>2</sup> (5 ms pulse duration).

545

546 **Stereotaxic surgery, AAV injection and calcium imaging**

547 Adult (8 – 10 week old) ChAT-IRES-Cre mice were deeply anesthetized via i.p.  
548 injection of ketamine (90 mg/kg) and xylazine (4.5 mg/kg) followed by head fixation in the  
549 stereotaxic setup. Using a nanoliter injector (World Precision Instruments, Sarasota, FL, USA),  
550 AAV9-hSynapsin1-FLEX-axon-GCaMP6s (Addgene #112010) was injected bilaterally into the  
551 MHb at a rate of 50 nl/min for 10 min to the following coordinates (in mm from Bregma): -1.45  
552 anterior/posterior, 0.6 lateral, -2.65 dorsal/ventral; angled at 20°. Animals were left to recover  
553 for 3 – 4 weeks and then, 1 mm thick slices were prepared and recovered as described in the  
554 electrophysiology section. After recovery, slices were transferred to the recording chamber  
555 and superfused with ACSF containing 2.5 mM Ca<sup>2+</sup> at RT. Stimulating electrodes were placed  
556 bilaterally on the fasciculus retroflexus. Widefield imaging of MHb axons in the rostral/central  
557 IPN was done using a 20X 0.5NA water-immersion objective (Olympus) and a monochrome  
558 CCD camera (XM10, Olympus). To visualize the axon-GCaMP6s, blue light was emitted  
559 from a pE-300 led light source (CoolLED) through a fluorescent cube with excitation filter  
560 460-490 nm, dichroic mirror 505 nm and barrier filter 510 nm (U-MWIB2, Olympus).  
561 GCaMP fluorescence in response to 10-Hz electrical stimulation (3-s duration, 0.2-ms  
562 pulse width, 0.5 – 2.5 V stimulation intensity) was recorded before and during the  
563 application of baclofen (1 μM). Full field-of-view frames were captured at 3 Hz and  
564 illumination was turned off in between sweeps (20-s sweep intervals).

565

## 566 **Calcium imaging-based modeling**

567 For modeling, a Java-based simulator called D3D<sup>50</sup>, running on a Windows 10  
568 operating system was used to calculate Ca<sup>2+</sup> binding with several Ca<sup>2+</sup> buffer species including  
569 GCaMP6. Assuming imaging from a whole presynaptic terminal, we allocated 16 VGCCs<sup>1</sup> in  
570 a single compartment (1 × 0.5 × 0.5 μm). In response to a single action potential (AP), each  
571 channel was allowed to carry Ca<sup>2+</sup> current in a Gaussian shape. The peak amplitude was set  
572 to 0.3 pA<sup>51,52</sup>. The half-duration of the current was adjusted to reproduce the amplitude of the

573 GCaMP6 fluorescent change after 10-Hz trains of 30 consecutive APs under baseline  
574 condition. The concentration of Ca<sup>2+</sup>-bound GCaMP6 was converted to a fluorescence change  
575  $\Delta F/F$ . We assumed that the two Ca<sup>2+</sup> binding sites in GCaMP6 protein bind Ca<sup>2+</sup>  
576 independently. All simulation parameters are summarized in Extended Data Table 1.

577

578 **Timed high-pressure freezing after optogenetic stimulation and freeze substitution**  
579 **(“Flash and Freeze”)**

580 ChAT-ChR2-EYFP mice (8 – 10 weeks old) were deeply anesthetized, transcardially  
581 perfused and the brain was excised as described above. 200- $\mu$ m thick coronal sections  
582 containing the IPN were cut and the IPN was trimmed using a razor blade. Trimmed IPN  
583 sections were left to recover as described above, followed by a 10 – 15 min incubation in  
584 ACSF containing 2.5 mM Ca<sup>2+</sup> and 1  $\mu$ M baclofen. Thereafter, sections were moved to the  
585 same ACSF containing 15% polyvinylpyrrolidone (PVP) followed by immediate assembly into  
586 a sapphire glass sandwich, consisting of two sapphire discs separated by a 200- $\mu$ m thick  
587 spacer ring and a 400- $\mu$ m thick spacer ring on the outside (Wohlwend GmbH, Switzerland),  
588 into a CLEM middle plate (Leica, Wetzlar, Germany) as described in Borges-Merjane et al.  
589 2020<sup>21</sup>. After trimming, slices were never touched directly and slice transfers between  
590 solutions or into the sapphire sandwich were carried out by careful pipetting using a  
591 handcrafted, flame-polished glass pipette. The sandwich was inserted into the ICE high-  
592 pressure freezer (Leica EM) and slices were optogenetically stimulated three times at 10 Hz  
593 (3-s duration, 5-ms pulse width, 10-s interval, measured light intensity 5.9 – 10 mW/mm<sup>2</sup>).  
594 Slices were rapidly frozen either 100 ms (depletion group) or 10 s after the third 10-Hz  
595 stimulation (recovery group). Control group slices were not incubated in baclofen and  
596 remained unstimulated.

597 Freeze substitution was performed as described previously<sup>21</sup>. In brief, frozen sapphire  
598 sandwiches were incubated acetone containing 0.1% tannic acid at -90 °C for 20 – 24 h inside

599 an AFS machine (Leica) under constant agitation. Thereafter, samples were washed with  
600 acetone (−90 °C) followed by incubation in acetone containing 2% osmium tetroxide and 0.2%  
601 uranyl acetate (AL-Labortechnik, Zeillern, Germany). Under continuing constant agitation,  
602 samples were then slowly warmed up to 0 °C in three steps: 1) from −90 °C to −60 °C over 2  
603 h, incubation at −60 °C for 3 h; 2) from −60 °C to −30 °C over 4 h, incubation at −30 °C for 3  
604 h; 3) from −30 °C to 0 over 3 h. Subsequently, slices were removed from the AFS machine,  
605 washed with acetone and propylene oxide and incubated in Durcupan resin (Sigma Aldrich;  
606 mixture of components A, B, C and D in proportion of 10:10:0.3:0.3, respectively) overnight  
607 (O/N). As slight improvement of the original Flash and Freeze method in acute slices, we  
608 performed an additional flat embedding step to precisely extract IPN subnuclei for further  
609 processing (Extended Data Fig. 3A). For flat embedding, each slice was placed on a silicon-  
610 coated glass slide, covered with an ACLAR® fluoropolymer film (Science Services, Munich,  
611 Germany) and incubated at 37 °C (1 h) followed by incubation at 60 °C (2 O/N). Using a razor  
612 blade, the rostral/central subnuclei were excised from the flat embedded slice, placed into a  
613 plastic tube (TAAB Laboratories Equipment Ltd., Aldermaston, UK) and re-embedded in  
614 Durcupan resin followed by incubation at 60 °C for 2 O/N. The resulting block was trimmed  
615 using a TRIM2 (Leica EM) and serial ultrathin sections (40 nm) were cut using a UC7  
616 ultramicrotome (Leica EM). Finally, sections were post-stained with 2% uranyl acetate for 10  
617 min and lead citrate for 2 min.

618

### 619 **“Flash and Freeze-fracture” and replica immunolabeling**

620 Acutely cut IPN slices from ChAT-ChR2-EYFP mice were prepared, trimmed and  
621 recovered as described for “Flash and Freeze”. After recovery, slices were incubated in ACSF  
622 containing 1 mM Ca<sup>2+</sup>, 1 mM TEA-Cl and 100 μM 4-AP with or without 1 μM baclofen for 5 –  
623 10 min. Thereafter, slices were moved to the same ACSF containing 2.5 mM Ca<sup>2+</sup>, 100 μM  
624 dynasore (HelloBio, Bristol, UK) and 15% PVP followed by assembly of the freezing sandwich  
625 consisting of a custom-made, gold-coated copper carrier, double-sided tape (150–μm



626 thickness) and a sapphire disc. After insertion into the ICE high-pressure freezer (Leica EM),  
627 slices were stimulated twice at 10 Hz (5–ms pulse width, 3–s duration, 10–s interval), followed  
628 by a single light pulse (8–ms duration) and high-pressure freezing, timed so that the sample  
629 reached 0 °C exactly 8–ms after light stimulation onset. Light application continued for another  
630 15 ms during the freezing process.

631 For freeze-fracture replication, a single metal-sapphire sandwich was inserted into an  
632 ACE900 freeze-fracture machine (Leica EM) and warmed up to –120 °C for 20 min under high  
633 vacuum of  $< 8 \times 10^{-7}$  bar. Thereafter, the frozen tissue was fractured by moving the knife  
634 through the double-sided tape between the metal carrier and the sapphire disc. After fracture,  
635 carbon/platinum replication was performed as described previously<sup>1</sup>. Briefly, a 5-nm layer of  
636 carbon angled at 90° was evaporated onto the fracture slice, followed a 2-nm layer of platinum  
637 angled at 60° and a final 20-nm layer of carbon at 90°. After removal of the replica from the  
638 machine, slices were transferred to 0.1 M phosphate buffer (PB) containing 2% PFA for post-  
639 fixation for 1 h, followed by tissue digestion in a solution containing 2.5 % SDS, 20% sucrose  
640 in 15 mM Tris buffer (pH 8.3) at 80 °C for 18 h under gentle agitation (50 rpm).

641 Following the SDS treatment, immunolabeling of replicas was performed as described  
642 previously<sup>1</sup>. In brief, replicas were washed in washing buffer containing 0.1% Tween-20,  
643 0.05% BSA, 0.05% NaN<sub>3</sub> in tris-buffered saline (TBS), pH 7.4. Thereafter, replicas were  
644 incubated in the same solution containing 5% BSA (blocking buffer) for 1 h and then incubated  
645 in the same solution containing 1% BSA and primary antibodies: guinea pig anti-CAPS2 (8  
646 µg/ml)<sup>33</sup> and rabbit anti-synaptoporin (6 µg/ml; SySy, Göttingen, Germany) for 24 h. Replicas  
647 were then washed, blocked and finally incubated in secondary antibody solution (washing  
648 buffer + 5% BSA) containing 5–nm gold-conjugated anti-rabbit and 10–nm gold-conjugated  
649 anti-guinea pig antibodies (both diluted 1:30, BBI Solutions, Cardiff, UK) for 1 O/N. The next  
650 day, replicas were washed, mounted onto EM grids and dried, followed by observation in a  
651 Tecnai12 transmission electron microscope (FEI Company, Hillsboro, OR, USA) at an  
652 accelerating voltage of 120 kV.

653

#### 654 **Immunohistochemistry**

655           50- $\mu$ m thick sections (perfused with 4% PFA) were washed in 25 mM phosphate-  
656 buffered saline (PBS) and incubated in blocking buffer containing 10% normal goat serum,  
657 2% BSA and 0.5% triton-X 100 in 25 mM PBS for one hour, followed by O/N incubation in  
658 primary antibodies in the same buffer: anti-CAPS2 (0.5  $\mu$ g/ml) or anti-synaptoporin (1  $\mu$ g/ml).  
659 Slices were then washed and incubated in blocking buffer containing secondary antibodies  
660 [1:500, Alexa-488 anti-guinea pig (Molecular Probes, Eugene, OR) or Alexa-488 anti-rabbit  
661 (Molecular probes)]. Washed sections were mounted on glass slides in Mowiol (Sigma Aldrich)  
662 and observed with an LSM 800 confocal microscope (Zeiss, Oberkochen, Germany).

663

#### 664 **Pre-embedding immunolabeling for EM**

665           Pre-embedding immunolabeling was performed as described previously<sup>1</sup>. Briefly, 50-  
666  $\mu$ m thick IPN slices (from 4% PFA and 0.05% glutaraldehyde perfused brains) were  
667 cryoprotected in a series of 5%, 15% and 20% sucrose in 0.1 M PB. Sections were then rapidly  
668 frozen in liquid nitrogen and immediately thawed three times. Freeze-thawed sections were  
669 treated with 50 mM glycine (Sigma Aldrich) in 50 mM TBS and were washed in TBS. Then,  
670 the sections were blocked in 2% BSA with 10% NGS in TBS followed by incubation in primary  
671 antibodies (guinea pig anti-CAPS2 (0.5  $\mu$ g/ml) or rabbit anti-synaptoporin (1  $\mu$ g/ml) or rabbit  
672 anti-GFP (Abcam, USA) in 2% BSA in TBS at 4 °C for 2 O/N and respective 1.4 nm gold-  
673 conjugated secondary antibodies (Nanoprobes Inc., USA) for silver intensification or in  
674 biotinylated anti-rabbit secondary antibody (Vector Labs, USA) for horseradish peroxidase  
675 (HRP) reaction for 1 ON at 4 °C. After washing in TBS and PBS, sections were post-fixed in  
676 1% glutaraldehyde in PBS, washed with 50 mM glycine in PBS followed by another wash in  
677 PBS.

678            Silver intensification: Sections were washed in MQ water and silver intensification was  
679 performed using a commercial kit (Nanoprobes Inc., USA). Equal drops of component A  
680 (initiator) and component B (moderator) were mixed and vortexed, followed by the addition of  
681 component C (activator). After vortexing all three components properly, sections were  
682 incubated in this solution in the dark. The silver intensification reaction was stopped by adding  
683 MQ water and sections were washed with 0.1 M PB.

684            HRP reaction: Sections were washed in TBS followed by incubation in avidin-biotin  
685 complex (ABC) solution (Vector Laboratories, USA) for two hours. ABC solution was prepared  
686 30 min prior by adding 1% avidin (A) to TBS, followed by addition of 1% biotin (B). After  
687 washing with TBS and tris-buffer (TB), sections were incubated in 0.05% di-amino benzidine  
688 (DAB) (VWR, Radnor, PA, USA) in TB for 15 min in the dark. Then, H<sub>2</sub>O<sub>2</sub> was added to a final  
689 concentration of 0.003%. After a dark coloring became visible in the IPN, the hydrogen  
690 peroxidase reaction was stopped by adding TB. Finally, sections were washed with 0.1 M PB.

691            After washing sections in 0.1 M PB after silver intensification or HRP reaction, sections  
692 were fixed with 1% osmium tetroxide in 0.1 M PB for 20 min in the dark. Sections were then  
693 washed in MQ and counterstained in 1% uranyl acetate in MQ for 30 minutes in the dark.  
694 Thereafter, dehydration was done in a serial dilution of ethanol from 50%, 70%, 90%, 95% to  
695 100%. Sections were further dehydrated in propylene oxide (Sigma Aldrich) and incubated  
696 dipped in durcupan resin O/N. On the next day, sections were flat embedded onto silicon  
697 coated glass slides and covered with an ACLAR® fluoropolymer film before polymerizing the  
698 resin for 2 O/N at 60 °C. Afterwards, rostral/central nuclei of IPN were cut by surgery blade  
699 and were re-embedded in resin in a TAAB tube. The resin was polymerized for 2 O/N at 60  
700 °C. 70 nm sections were cut by Leica EM UC7 ultramicrotome (Leica, Germany) and were  
701 observed in a Tecnai 12 transmission electron microscope.

702

703 **Flash and Fix**

704 200- $\mu\text{m}$  thick coronal IPN slices of ChAT-ChR2-EYFP mice were prepared and  
705 recovered as described for “Flash and Freeze” experiments. After recovery, slices were  
706 incubated for 10 – 15 min in ACSF containing either 2.5 mM  $\text{Ca}^{2+}$  (“Control” and “10 Hz”  
707 groups) or 2.5 mM  $\text{Ca}^{2+}$  and 1  $\mu\text{M}$  baclofen (“10 Hz + Baclofen” group). Each slice was then  
708 optogenetically stimulated three times at 10 Hz for 3 s (10 s interval) followed by immediate  
709 immersion fixation in 0.1 M PB containing 4% PFA, 0.05% glutaraldehyde and 15% picric acid  
710 under constant agitation for 45 min, followed by washing in 0.1 M PB. Control slices were  
711 immersion-fixed without light stimulation. Thereafter, pre-embedding immunolabeling and EM  
712 sample preparation was performed as described above.

713

## 714 **Analysis**

715 Electrophysiology: All electrophysiological recordings were analyzed in Clampfit  
716 (Molecular Devices), Excel (Microsoft, Redmond, WA, USA) and Prism 8 (Graphpad, San  
717 Diego, CA, USA).

718 Flash and Freeze: Serial EM images were analyzed manually in Reconstruct software  
719 (John C. Fiala, Ph.D.). The average number of serial images analyzed per synapse was  $6.3 \pm$   
720  $0.3$  ( $n=52$  synapses). SV diameter was measured in SVs with a clearly visible lipid bilayer as  
721 the distance between the two outer membranes through the SV center. The AZ was  
722 determined by 1) the presence of a postsynaptic density on the opposing postsynaptic side  
723 and 2) electron density inside the synaptic cleft. To minimize variability caused by different  
724 synapse sizes, distance of SVs was measured in a specified perimeter around the AZ.  
725 Specifically, a box was drawn including the AZ with the following specifications: 150 nm to the  
726 left and right of the AZ along the membrane and from there, 200 nm at right angle away from  
727 the presynaptic membrane towards the presynaptic cytosol. The open ends were connected  
728 to close the box. Inside this box, the distance of the center of all SVs to the closest inner  
729 membrane leaflet of the AZ was measured. SVs were considered docked when they had direct

730 contact with the AZ and/or the center of the SV was within a distance of 20–nm to the inner  
731 leaflet of the presynaptic membrane.

732 Calcium imaging: Recorded image series were analyzed using Fiji for Image J. In each  
733 recording, 3 – 5 puncta were chosen as regions of interest (ROI) and fluorescence was  
734 measured at each ROI. Measured values were then normalized to the fluorescence intensity  
735 prior to the start of electrical stimulation at each ROI ( $F_0$ ). For each slice, the time courses of  
736 fluorescence intensity at each ROI were then averaged for baseline and baclofen groups,  
737 resulting in a single trace for each condition.

738 Flash and Fix: Ultrathin sections of chemically fixed acute slices were analyzed in  
739 Reconstruct software to count the number of silver-intensified gold particles in the AZ.

740 Flash and Freeze-fracture: Replica immunogold labeling were analyzed using Darea  
741 software<sup>53</sup>. In brief, presynaptic membrane profiles were manually demarcated and gold  
742 particles were automatically detected. Validity of automated detection was manually  
743 confirmed. Analysis of nearest neighbor distances (NNDs) from 10 nm particles for CAPS2 to  
744 the nearest 5 nm particle for SPO were computed to evaluate co-localization of CAPS2 and  
745 SPO. We performed Monte-Carlo fitted simulations<sup>53</sup> to place randomly the SPO particles with  
746 constraints that they keep the minimum distance of 10 nm to other particles and that the  
747 distribution of NND for SPO between the simulated and original particles should not  
748 significantly differ (as assessed by two-sample Kolmogorov-Smirnov (KS) test,  $p > 0.1$ )<sup>53</sup>.  
749 Statistical differences in NND between CAPS2 to the original and simulated SPO particles  
750 were compared by KS test using R software (version 4.1.0).

751 Unless otherwise noted, all data are presented as mean  $\pm$  SEM. Parametric tests were  
752 performed unless data failed Shapiro-Wilk normality test, in which case nonparametric tests  
753 were used. Statistical analysis was performed in Prism 8 unless otherwise stated. Figures  
754 were prepared using Prism 8 and Photoshop (Adobe, San Jose, CA, USA).

755

756 **Acknowledgments**

757 We thank Erwin Neher and Ipe Ninan for critical comments on the manuscript. This project  
758 has received funding from the European Research Council (ERC) and European Commission  
759 (EC), under the European Union’s Horizon 2020 research and innovation programme (ERC  
760 grant agreement no. 694539 to Ryuichi Shigemoto and the Marie Skłodowska-Curie grant  
761 agreement no. 665385 to Cihan Önal). This study was supported by the Cooperative Study  
762 Program (e—201) of Center for Animal Resources and Collaborative Study of NINS. We thank  
763 Kohgaku Eguchi for statistical analysis, Todor Asenov from the ISTA machine shop for custom  
764 part preparations for high-pressure freezing and the electron microscopy facility at ISTA for  
765 technical support.

766

767 **Author contributions:**

768 PK performed electrophysiology experiments, calcium imaging, and high-pressure freezing of  
769 “Flash and Freeze” and “Flash and Freeze-fracture” experiments; PK and PB fractured “Flash  
770 and Freeze-fracture” samples; PB performed immunolabelings for fluorescence imaging, pre-  
771 embedding and “Flash and Freeze-fracture” replica sample preparations, and freeze  
772 substitution experiments. PB and ELM performed confocal imaging; CÖ performed viral  
773 injections, established calcium imaging and cut acute slices for calcium imaging; PK, PB and  
774 ELM performed EM imaging of “Flash and Freeze” samples; PK performed “Flash and Freeze-  
775 fracture” and “Flash and Fix” EM imaging; YN performed modeling based on calcium imaging  
776 data; CBM taught PK how to use Leica EM ICE; MS and MH made SPO KO mice using the  
777 CRISPR/Cas9 method; PJ, NB and TS provided tools and reagents. PK analyzed data and  
778 prepared figures; RS and PK conceived the study, designed experiments, and wrote the  
779 manuscript. All authors have read and jointly revised the manuscript and approved its content.

## 780 References

- 781 1 Bhandari, P. *et al.* GABA<sub>B</sub> receptor auxiliary subunits modulate Cav2.3-mediated release from  
782 medial habenula terminals. *Elife* **10**, doi:10.7554/eLife.68274 (2021).
- 783 2 Koppensteiner, P., Galvin, C. & Ninan, I. Development- and experience-dependent plasticity in  
784 the dorsomedial habenula. *Mol Cell Neurosci* **77**, 105-112, doi:10.1016/j.mcn.2016.10.006  
785 (2016).
- 786 3 Koppensteiner, P., Melani, R. & Ninan, I. A Cooperative Mechanism Involving Ca<sup>2+</sup>-Permeable  
787 AMPA Receptors and Retrograde Activation of GABA<sub>B</sub> Receptors in Interpeduncular Nucleus  
788 Plasticity. *Cell Rep* **20**, 1111-1122, doi:10.1016/j.celrep.2017.07.013 (2017).
- 789 4 Zhang, J. *et al.* Presynaptic Excitation via GABA<sub>B</sub> Receptors in Habenula Cholinergic Neurons  
790 Regulates Fear Memory Expression. *Cell* **166**, 716-728, doi:10.1016/j.cell.2016.06.026 (2016).
- 791 5 Gassmann, M. & Bettler, B. Regulation of neuronal GABA(B) receptor functions by subunit  
792 composition. *Nat Rev Neurosci* **13**, 380-394, doi:10.1038/nrn3249 (2012).
- 793 6 Melani, R., Von Itter, R., Jing, D., Koppensteiner, P. & Ninan, I. Opposing effects of an atypical  
794 glycinergic and substance P transmission on interpeduncular nucleus plasticity.  
795 *Neuropsychopharmacology* **44**, 1828-1836, doi:10.1038/s41386-019-0396-6 (2019).
- 796 7 Fioravante, D. & Regehr, W. G. Short-term forms of presynaptic plasticity. *Curr Opin Neurobiol*  
797 **21**, 269-274, doi:10.1016/j.conb.2011.02.003 (2011).
- 798 8 Neher, E. & Brose, N. Dynamically Primed Synaptic Vesicle States: Key to Understand Synaptic  
799 Short-Term Plasticity. *Neuron* **100**, 1283-1291, doi:10.1016/j.neuron.2018.11.024 (2018).
- 800 9 Atwood, H. L. & Karunanithi, S. Diversification of synaptic strength: presynaptic elements. *Nat*  
801 *Rev Neurosci* **3**, 497-516, doi:10.1038/nrn876 (2002).
- 802 10 Zucker, R. S. & Regehr, W. G. Short-term synaptic plasticity. *Annu Rev Physiol* **64**, 355-405,  
803 doi:10.1146/annurev.physiol.64.092501.114547 (2002).
- 804 11 Aldahabi, M. *et al.* Different priming states of synaptic vesicles underlie distinct release  
805 probabilities at hippocampal excitatory synapses. *Neuron*, doi:10.1016/j.neuron.2022.09.035  
806 (2022).
- 807 12 Zhao, H. & Rusak, B. Circadian firing-rate rhythms and light responses of rat habenular nucleus  
808 neurons in vivo and in vitro. *Neuroscience* **132**, 519-528,  
809 doi:10.1016/j.neuroscience.2005.01.012 (2005).
- 810 13 Sharp, P. E., Turner-Williams, S. & Tuttle, S. Movement-related correlates of single cell activity  
811 in the interpeduncular nucleus and habenula of the rat during a pellet-chasing task. *Behav*  
812 *Brain Res* **166**, 55-70, doi:10.1016/j.bbr.2005.07.004 (2006).
- 813 14 Sylwestrak, E. L. *et al.* Cell-type-specific population dynamics of diverse reward computations.  
814 *Cell* **185**, 3568-3587 e3527, doi:10.1016/j.cell.2022.08.019 (2022).
- 815 15 Ren, J. *et al.* Habenula "cholinergic" neurons co-release glutamate and acetylcholine and  
816 activate postsynaptic neurons via distinct transmission modes. *Neuron* **69**, 445-452,  
817 doi:10.1016/j.neuron.2010.12.038 (2011).
- 818 16 Kalkstein, J. M. & Magleby, K. L. Augmentation increases vesicular release probability in the  
819 presence of masking depression at the frog neuromuscular junction. *J Neurosci* **24**, 11391-  
820 11403, doi:10.1523/JNEUROSCI.2756-04.2004 (2004).
- 821 17 Eggermann, E., Bucurenciu, I., Goswami, S. P. & Jonas, P. Nanodomain coupling between  
822 Ca(2)(+) channels and sensors of exocytosis at fast mammalian synapses. *Nat Rev Neurosci* **13**,  
823 7-21, doi:10.1038/nrn3125 (2011).
- 824 18 Schneggenburger, R., Meyer, A. C. & Neher, E. Released fraction and total size of a pool of  
825 immediately available transmitter quanta at a calyx synapse. *Neuron* **23**, 399-409,  
826 doi:10.1016/s0896-6273(00)80789-8 (1999).
- 827 19 Kaeser, P. S. & Regehr, W. G. The readily releasable pool of synaptic vesicles. *Curr Opin*  
828 *Neurobiol* **43**, 63-70, doi:10.1016/j.conb.2016.12.012 (2017).

- 829 20 Imig, C. *et al.* The morphological and molecular nature of synaptic vesicle priming at  
830 presynaptic active zones. *Neuron* **84**, 416-431, doi:10.1016/j.neuron.2014.10.009 (2014).
- 831 21 Borges-Merjane, C., Kim, O. & Jonas, P. Functional Electron Microscopy, "Flash and Freeze,"  
832 of Identified Cortical Synapses in Acute Brain Slices. *Neuron* **105**, 992-1006 e1006,  
833 doi:10.1016/j.neuron.2019.12.022 (2020).
- 834 22 Nagel, G. *et al.* Channelrhodopsin-2, a directly light-gated cation-selective membrane channel.  
835 *Proc Natl Acad Sci U S A* **100**, 13940-13945, doi:10.1073/pnas.1936192100 (2003).
- 836 23 Berndt, A. *et al.* High-efficiency channelrhodopsins for fast neuronal stimulation at low light  
837 levels. *Proc Natl Acad Sci U S A* **108**, 7595-7600, doi:10.1073/pnas.1017210108 (2011).
- 838 24 Knaus, P., Marqueze-Pouey, B., Scherer, H. & Betz, H. Synaptoporin, a novel putative channel  
839 protein of synaptic vesicles. *Neuron* **5**, 453-462, doi:10.1016/0896-6273(90)90084-s (1990).
- 840 25 Singec, I. *et al.* Synaptic vesicle protein synaptoporin is differently expressed by  
841 subpopulations of mouse hippocampal neurons. *J Comp Neurol* **452**, 139-153,  
842 doi:10.1002/cne.10371 (2002).
- 843 26 Müller, C. S. *et al.* Quantitative proteomics of the Cav2 channel nano-environments in the  
844 mammalian brain. *Proc Natl Acad Sci U S A* **107**, 14950-14957, doi:10.1073/pnas.1005940107  
845 (2010).
- 846 27 Jockusch, W. J. *et al.* CAPS-1 and CAPS-2 are essential synaptic vesicle priming proteins. *Cell*  
847 **131**, 796-808, doi:10.1016/j.cell.2007.11.002 (2007).
- 848 28 Sadakata, T. *et al.* Impaired cerebellar development and function in mice lacking CAPS2, a  
849 protein involved in neurotrophin release. *J Neurosci* **27**, 2472-2482,  
850 doi:10.1523/JNEUROSCI.2279-06.2007 (2007).
- 851 29 Shinoda, Y. *et al.* Calcium-dependent activator protein for secretion 2 (CAPS2) promotes BDNF  
852 secretion and is critical for the development of GABAergic interneuron network. *Proc Natl*  
853 *Acad Sci U S A* **108**, 373-378, doi:10.1073/pnas.1012220108 (2011).
- 854 30 Sadakata, T. *et al.* Differential distributions of the Ca<sup>2+</sup>-dependent activator protein for  
855 secretion family proteins (CAPS2 and CAPS1) in the mouse brain. *J Comp Neurol* **495**, 735-753,  
856 doi:10.1002/cne.20947 (2006).
- 857 31 Lin, K. H., Taschenberger, H. & Neher, E. A sequential two-step priming scheme reproduces  
858 diversity in synaptic strength and short-term plasticity. *Proc Natl Acad Sci U S A* **119**,  
859 e2207987119, doi:10.1073/pnas.2207987119 (2022).
- 860 32 Neher, E. & Taschenberger, H. Non-negative Matrix Factorization as a Tool to Distinguish  
861 Between Synaptic Vesicles in Different Functional States. *Neuroscience* **458**, 182-202,  
862 doi:10.1016/j.neuroscience.2020.10.012 (2021).
- 863 33 Sadakata, T. *et al.* The secretory granule-associated protein CAPS2 regulates neurotrophin  
864 release and cell survival. *J Neurosci* **24**, 43-52, doi:10.1523/JNEUROSCI.2528-03.2004 (2004).
- 865 34 Berwin, B., Floor, E. & Martin, T. F. CAPS (mammalian UNC-31) protein localizes to membranes  
866 involved in dense-core vesicle exocytosis. *Neuron* **21**, 137-145, doi:10.1016/s0896-  
867 6273(00)80521-8 (1998).
- 868 35 Stevens, D. R. & Rettig, J. The Ca(2+)-dependent activator protein for secretion CAPS: do I dock  
869 or do I prime? *Mol Neurobiol* **39**, 62-72, doi:10.1007/s12035-009-8052-5 (2009).
- 870 36 Nguyen Truong, C. Q. *et al.* Secretory vesicle priming by CAPS is independent of its SNARE-  
871 binding MUN domain. *Cell Rep* **9**, 902-909, doi:10.1016/j.celrep.2014.09.050 (2014).
- 872 37 Vandael, D., Borges-Merjane, C., Zhang, X. & Jonas, P. Short-Term Plasticity at Hippocampal  
873 Mossy Fiber Synapses Is Induced by Natural Activity Patterns and Associated with Vesicle Pool  
874 Engram Formation. *Neuron* **107**, 509-521 e507, doi:10.1016/j.neuron.2020.05.013 (2020).
- 875 38 Maciewicz, R., Foote, W. E. & Bry, J. Excitatory projection from the interpeduncular nucleus to  
876 central superior raphe neurons. *Brain Res* **225**, 179-183, doi:10.1016/0006-8993(81)90327-9  
877 (1981).



- 878 39 Marcinkiewicz, M., Morcos, R. & Chretien, M. CNS connections with the median raphe  
879 nucleus: retrograde tracing with WGA-apoHRP-Gold complex in the rat. *J Comp Neurol* **289**,  
880 11-35, doi:10.1002/cne.902890103 (1989).
- 881 40 McLaughlin, I., Dani, J. A. & De Biasi, M. The medial habenula and interpeduncular nucleus  
882 circuitry is critical in addiction, anxiety, and mood regulation. *J Neurochem* **142 Suppl 2**, 130-  
883 143, doi:10.1111/jnc.14008 (2017).
- 884 41 Szonyi, A. *et al.* Median raphe controls acquisition of negative experience in the mouse.  
885 *Science* **366**, eaay8746, doi:10.1126/science.aay8746 (2019).
- 886 42 Varga, V., Kekesi, A., Juhasz, G. & Kocsis, B. Reduction of the extracellular level of glutamate  
887 in the median raphe nucleus associated with hippocampal theta activity in the anaesthetized  
888 rat. *Neuroscience* **84**, 49-57, doi:10.1016/s0306-4522(97)00489-2 (1998).
- 889 43 Viana Di Prisco, G., Albo, Z., Vertes, R. P. & Kocsis, B. Discharge properties of neurons of the  
890 median raphe nucleus during hippocampal theta rhythm in the rat. *Exp Brain Res* **145**, 383-  
891 394, doi:10.1007/s00221-002-1123-8 (2002).
- 892 44 Bromberg-Martin, E. S., Matsumoto, M. & Hikosaka, O. Distinct tonic and phasic anticipatory  
893 activity in lateral habenula and dopamine neurons. *Neuron* **67**, 144-155,  
894 doi:10.1016/j.neuron.2010.06.016 (2010).
- 895 45 Yoo, H. *et al.* Down-regulation of habenular calcium-dependent secretion activator 2 induces  
896 despair-like behavior. *Sci Rep* **11**, 3700, doi:10.1038/s41598-021-83310-0 (2021).
- 897 46 Kawaja, M. D., Flumerfelt, B. A. & Hryciashyn, A. W. Glutamate decarboxylase  
898 immunoreactivity in the rat interpeduncular nucleus: a light and electron microscope  
899 investigation. *Neuroscience* **30**, 741-753, doi:10.1016/0306-4522(89)90166-8 (1989).
- 900 47 Kawaja, M. D., Flumerfelt, B. A. & Hryciashyn, A. W. Simultaneous demonstration of choline  
901 acetyltransferase and glutamic acid decarboxylase immunoreactivity in the rat  
902 interpeduncular nucleus. *J Chem Neuroanat* **3**, 165-177 (1990).
- 903 48 Antolin-Fontes, B., Ables, J. L., Gorlich, A. & Ibanez-Tallon, I. The habenulo-interpeduncular  
904 pathway in nicotine aversion and withdrawal. *Neuropharmacology* **96**, 213-222,  
905 doi:10.1016/j.neuropharm.2014.11.019 (2015).
- 906 49 Adams, D. J., Arthur, C. P. & Stowell, M. H. Architecture of the Synaptophysin/Synaptobrevin  
907 Complex: Structural Evidence for an Entropic Clustering Function at the Synapse. *Sci Rep* **5**,  
908 13659, doi:10.1038/srep13659 (2015).
- 909 50 Nakamura, Y. *et al.* Nanoscale distribution of presynaptic Ca(2+) channels and its impact on  
910 vesicular release during development. *Neuron* **85**, 145-158,  
911 doi:10.1016/j.neuron.2014.11.019 (2015).
- 912 51 Li, L., Bischofberger, J. & Jonas, P. Differential gating and recruitment of P/Q-, N-, and R-type  
913 Ca<sup>2+</sup> channels in hippocampal mossy fiber boutons. *J Neurosci* **27**, 13420-13429,  
914 doi:10.1523/JNEUROSCI.1709-07.2007 (2007).
- 915 52 Sheng, J. *et al.* Calcium-channel number critically influences synaptic strength and plasticity at  
916 the active zone. *Nat Neurosci* **15**, 998-1006, doi:10.1038/nn.3129 (2012).
- 917 53 Kleindienst, D. *et al.* Deep Learning-Assisted High-Throughput Analysis of Freeze-Fracture  
918 Replica Images Applied to Glutamate Receptors and Calcium Channels at Hippocampal  
919 Synapses. *Int J Mol Sci* **21**, doi:10.3390/ijms21186737 (2020).

920

921

922 **Figure Legends**

923 **Figure 1: Stimulation of MHb axons at a physiological frequency reveals transition from**  
924 **tonic to phasic neurotransmitter release by baclofen**

925 **A** Scheme of the 1 mm thick angled slice preparation (top) and an example of the recording  
926 configuration in the resulting slice (bottom). **B** Example traces of EPSCs evoked by 10-Hz  
927 stimulation in one cell before and after the application of baclofen. Greyed responses  
928 represent individual sweeps, and bold responses represent the average of the individual  
929 traces. **C** Quantification of baseline and baclofen responses using cumulative EPSC  
930 amplitudes. **D** Plot of EPSC responses after normalization of EPSC amplitudes to the  
931 amplitude of the corresponding first baseline EPSC **E** Overlay of 7 traces of 10 Hz responses  
932 at baseline and during baclofen in one cell with single stimulations at varying intervals following  
933 the 10 Hz stimulus. **F** Overlay of single stimuli color-coded with stimulation time. **G**  
934 Quantification of recovery from tonic release augmentation and phasic release depletion.  
935 Using exponential fit, both short-term plasticity exhibited recovery times in the order of  
936 seconds.

937 See also Extended Data Fig. 1

938

939 **Figure 2: Role of presynaptic Ca<sup>2+</sup> in tonic and phasic neurotransmission**

940 **A** Example images of axon-GCaMP6s fluorescence at rest (left) and at peak fluorescence  
941 during stimulation (middle) under baseline (top) and baclofen conditions (bottom). Subtraction  
942 of resting fluorescence from peak fluorescence reveals stimulation-induced fluorescence in a  
943 subset of MHb axons (right panels). Scale bars, 50  $\mu$ m **B** Quantification of GCaMP6s  
944 fluorescence time course during stimulation under baseline and baclofen conditions in five  
945 slices from five mice. \*\*\*  $P < 0.001$  two-way ANOVA with Bonferroni post hoc test **C** Example  
946 traces of 10-Hz responses at 2.5 mM and 5 mM Ca<sup>2+</sup> and at 5 mM Ca<sup>2+</sup> + 1  $\mu$ M baclofen. **D**  
947 Cumulative EPSC amplitude quantification reveals tonic release at 5 mM Ca<sup>2+</sup> and a strong

948 transition to phasic release after the addition of baclofen. **E** Normalization of EPSC responses  
949 to the first EPSC in the train shows augmentation in 2.5 and 5 mM Ca<sup>2+</sup> condition and depletion  
950 at 5 mM Ca<sup>2+</sup> + baclofen. **F – G** K<sup>+</sup> channel blockers TEA and 4-AP did not induce phasic  
951 release and did not occlude phasic release induction by baclofen. **I** Example trace of a phasic  
952 response before and 10 min after the application of 100 μM EGTA-AM. **J** Cumulative EPSC  
953 amplitude plot before and after EGTA-AM application. **K** Comparison before and after EGTA-  
954 AM application reveals significant reduction in EPSC<sub>1</sub> amplitude. P value calculated with  
955 Wilcoxon test. **L – N** Application of EGTA-AM prior to baclofen prevents phasic release  
956 induction but does not significantly alter tonic release and its EPSC<sub>1</sub> amplitudes. P value  
957 calculated by one-way ANOVA.

958 See also Extended Data Fig. 2 and Extended Data Table 1

959

### 960 **Figure 3: Comparison of RRP and P<sub>r</sub> between tonic and phasic release**

961 **A** Example traces of EPSC responses during 100-Hz stimulation at baseline and after  
962 baclofen application. **B** Baseline and baclofen cumulative EPSC amplitude plots with linear  
963 regression fit through the last 6 stimuli (#25 – #30). **C** Paired comparison of RRP sizes before  
964 and after baclofen. P value derived from Wilcoxon t-test. **D** Paired comparison of P<sub>r</sub> at baseline  
965 and after baclofen, P values calculated by two-tailed unpaired t-test.

966

### 967 **Figure 4: Structural correlates of enhanced neurotransmitter release**

968 **A** EYFP Fluorescence in an angled ChAT-ChR2-EYFP slice (left) and tonic and phasic  
969 example traces evoked by optogenetic stimulation in a cell before and during the application  
970 of baclofen. **B** Recovery time courses of normalized EPSC amplitudes after augmentation  
971 (baseline) and depletion (baclofen). **C** Top, expanded phasic example trace from panel A  
972 highlighting freezing time points for depletion and recovery groups in the presence of baclofen.

973 Bottom left, overlay of individual EPSCs over the course of recovery. Bottom right, overlay of  
974 individual EPSC onsets during phasic release recovery. **D** Step-by-step scheme displaying  
975 the “Flash and Freeze” experiments up to the freezing step. **E** Example EM images of  
976 synapses from Control, Depletion and Recovery groups. Scale bars, 100 nm **F**  
977 Quantification of synaptic vesicle (SV) diameters across groups. P value derived from one-  
978 way ANOVA. **G** Plot of SV numbers (normalized to the number of analyzed serial sections) in  
979 bins of 5–nm from the AZ membrane. \*\*\*  $P < 0.001$  Recovery vs. Control and Depletion, two-  
980 way ANOVA with Bonferroni post hoc test. **H** Quantification of docked SV densities. Values  
981 above bars indicate p values calculated by one-way ANOVA with Tukey post hoc test.

982 See also Extended Data Fig. 3

983

984 **Figure 5: SV-associated molecules involved in tonic and phasic neurotransmitter**  
985 **release**

986 **A** Confocal images of anti-synaptoporin immunofluorescence labeling in the IPN of a WT and  
987 a SPO KO mouse. Scale bars, 100  $\mu\text{m}$ . **B** Pre-embedding immunolabeling for SPO in an MHb  
988 terminal, showing gold particles co-localized with SVs. Scale bar, 100 nm. **C** Example 10–Hz  
989 EPSC traces of a recording in an acute slice from a SPO KO mouse at baseline and during  
990 baclofen application. **D** Tonic release augmentation was significantly impaired in SPO KO  
991 mice, displayed P value of main effect of genotype, calculated by two-way ANOVA. Bonferroni  
992 post hoc analysis revealed a significant difference in stimuli #20 – #30. **E** Overlay of phasic  
993 release  $P_r$  time course between WT and SPO KO mice, calculated by linear regression  
994 analysis of cumulative EPSC amplitude plots<sup>18</sup>. **F**  $P_r$  of EPSC<sub>1</sub> in the phasic response train  
995 was not different between WT and SPO KO mice. P value calculated from two-tailed unpaired  
996 t-test. **G** Confocal images of anti-CAPS2 immunofluorescence labeling in the IPN of a WT and  
997 CAPS2 KO mouse. Scale bars, 100  $\mu\text{m}$  **H** Pre-embedding immunolabeling for CAPS2 in a  
998 MHb terminal shows gold particles co-localized with SVs. Scale bar, 100 nm. **I** Example 10 Hz

999 EPSC traces recorded in an acute slice from a CAPS2 KO mouse at baseline and during  
1000 baclofen application. **J** Augmentation remained unaffected by genetic ablation of CAPS2.  
1001 Main effect of genotype P value calculated via two-way ANOVA **K**  $P_r$  time course of phasic  
1002 release, calculated by linear regression analysis of cumulative EPSC amplitude plots, was  
1003 strongly affected by genetic ablation of CAPS2 compared to WT. **L**  $P_r$  of EPSC<sub>1</sub> in the phasic  
1004 response was significantly lower in CAPS2 KO compared to WT mice. P value calculated by  
1005 two-tailed unpaired t-test.

1006 See also Extended Data Fig. 4 and Extended Data Fig. 5

1007

### 1008 **Figure 6: Potentiation by GBR activation and its storage is activity-dependent**

1009 **A** Example thick-slice configuration of recording in IPN with bilateral MHb input stimulation.  
1010 To examine activity-dependence (**B**), a single IPN neuron was patched and after bilateral  
1011 baseline recordings (10-Hz stimulation for 3 s, 5-s interval between left and right side  
1012 stimulations, 20 s between sweeps), stimulation with the red-highlighted electrode was halted  
1013 during baclofen washin, whereas stimulation was continued with the other electrode (10 Hz,  
1014 3-s duration, every 20 s). Once maximal potentiation was reached, stimulation with the red-  
1015 highlighted electrode resumed. To examine storage of potentiation (**C**), after bilateral baseline  
1016 recording and bilateral induction of maximal potentiation, baclofen washout commenced and  
1017 stimulation with the red-highlighted electrode was halted. Stimulation with the other electrode  
1018 continued and, once potentiation was fully reverted, stimulation with the red-highlighted  
1019 electrode resumed. **B** Left, example traces derived from the silent side at baseline (1), at the  
1020 first (2) and second (3) 10-Hz stimulus after silent baclofen washin. Right, time course of  
1021 EPSC<sub>1</sub> amplitudes, relative to baseline, during stimulated and silent washin of baclofen. **C**  
1022 Left, example traces derived from the silent side at peak potentiation (1), at the first (2) and  
1023 second (3) stimulus after silent baclofen washout. Right, time course of relative EPSC<sub>1</sub>  
1024 amplitudes during stimulated and silent washout of baclofen.

1025

1026 **Figure 7: Recruitment of CAPS2 to the active zone during phasic release**

1027 **A** Example images of pre-embedding EM labeling for CAPS2 in acute slices under control  
1028 conditions without stimulation and after 10–Hz stimulation in the absence (10 Hz) or presence  
1029 of 1  $\mu$ M baclofen (10 Hz + Baclofen). **B** Quantification of particle numbers in the AZ reveals  
1030 significantly larger CAPS2 particle numbers in the “10 Hz + Baclofen” group compared to the  
1031 other groups. P values calculated by one-way ANOVA with Tukey post hoc test.

1032

1033 **Figure 8: “Flash and Freeze-fracture” replica immunolabeling for SPO and CAPS2 in**  
1034 **the presynaptic active zone during tonic and phasic release**

1035 **A** “Flash and Freeze-fracture” steps schematic. Left Panel, “Flash and Freeze” of acute brain  
1036 slices using sapphire/metal hybrid sandwich separated by a double-sided tape. Middle panel,  
1037 Freeze-fracture replication of frozen brain slices using a knife to separate sapphire from the  
1038 metal carrier. Right Panel, SDS treatment of tissue and immunolabeling with primary  
1039 antibodies against SPO and CAPS2 followed by labeling with 5 nm and 10 nm gold-conjugated  
1040 secondary antibodies. **B** Example images of SPO and CAPS2 labeling in “Flash and Freeze-  
1041 fracture” replicas frozen without light stimulation (ACSF) or after an 8 ms light pulse in the  
1042 absence (Stimulation) or presence of 1  $\mu$ M baclofen (Stimulation + Baclofen). Scale bars, 100  
1043 nm **C** Quantification of CAPS2/SPO particle ratio revealed a significant increase in the  
1044 “Stimulation + Baclofen” group. P values derived from one-way ANOVA with Tukey post hoc  
1045 test. **D** Summary scheme depicting a hypothetical two-pool mechanism underlying the  
1046 transition from the tonic to phasic release mode in MHB terminals. Left: In the basal release  
1047 condition, tonic SPO-positive SVs are loosely docked in close vicinity of Cav2.3, whereas  
1048 CAPS2-positive phasic SVs are located more distally and undocked. Action potential-triggered  
1049  $\text{Ca}^{2+}$  influx is small and only closely located SPO-positive tonic SVs fuse with the AZ  
1050 membrane. Right: In the enhanced release condition, GBR activation coupled with action

1051 potential-mediated depolarization produces a massive influx of  $\text{Ca}^{2+}$ , which initially triggers  
1052 release of closely located SPO-positive tonic SVs but also rapidly recruits larger number of  
1053 distal CAPS2-positive phasic SVs (middle) to the AZ. The subsequent action potentials trigger  
1054 the release of both closely located tonic and newly recruited phasic SVs, resulting in an  
1055 increased RRP (right). Following the fusion of CAPS2-positive phasic SVs, CAPS2 remains  
1056 membrane-bound and may act as a docking site for replenished phasic SVs, resulting in  
1057 retention of the increased RRP.

1058 See also Extended Data Fig. 6

Figure 1

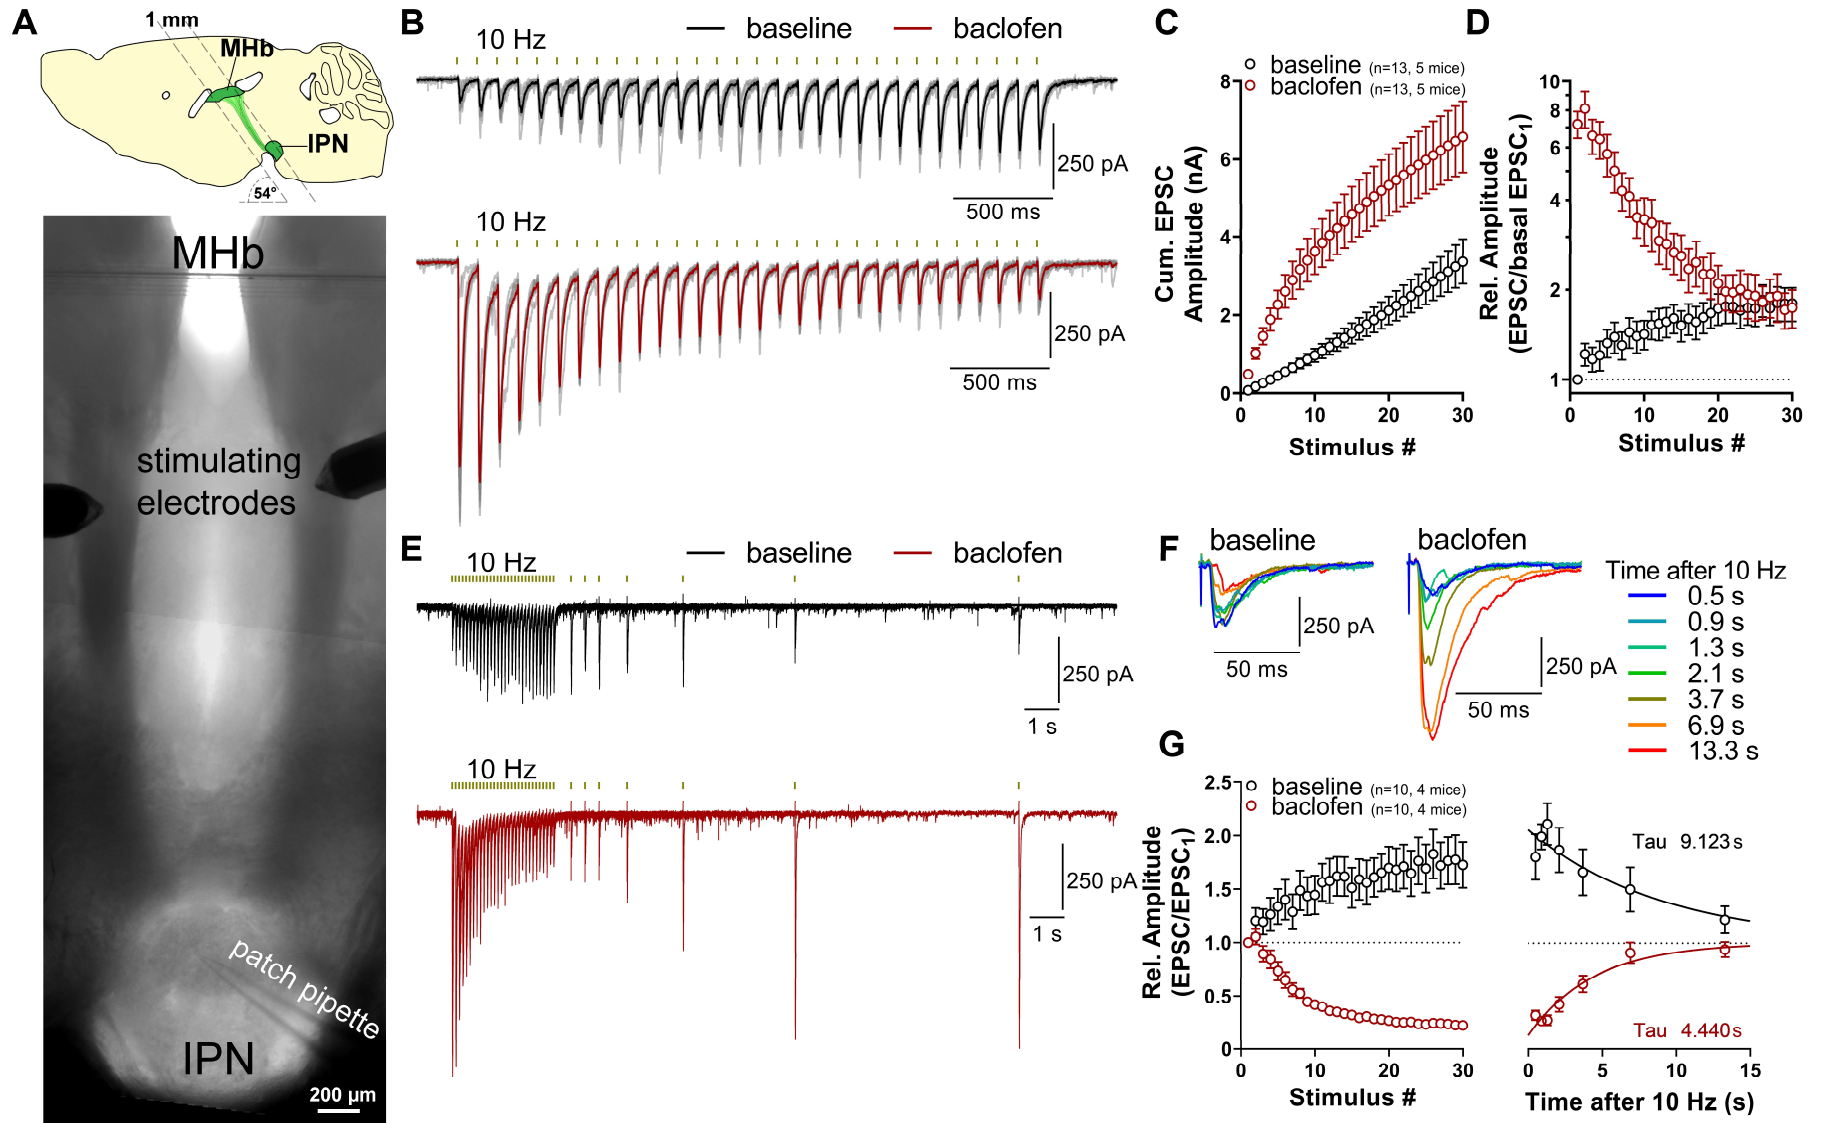



Figure 2

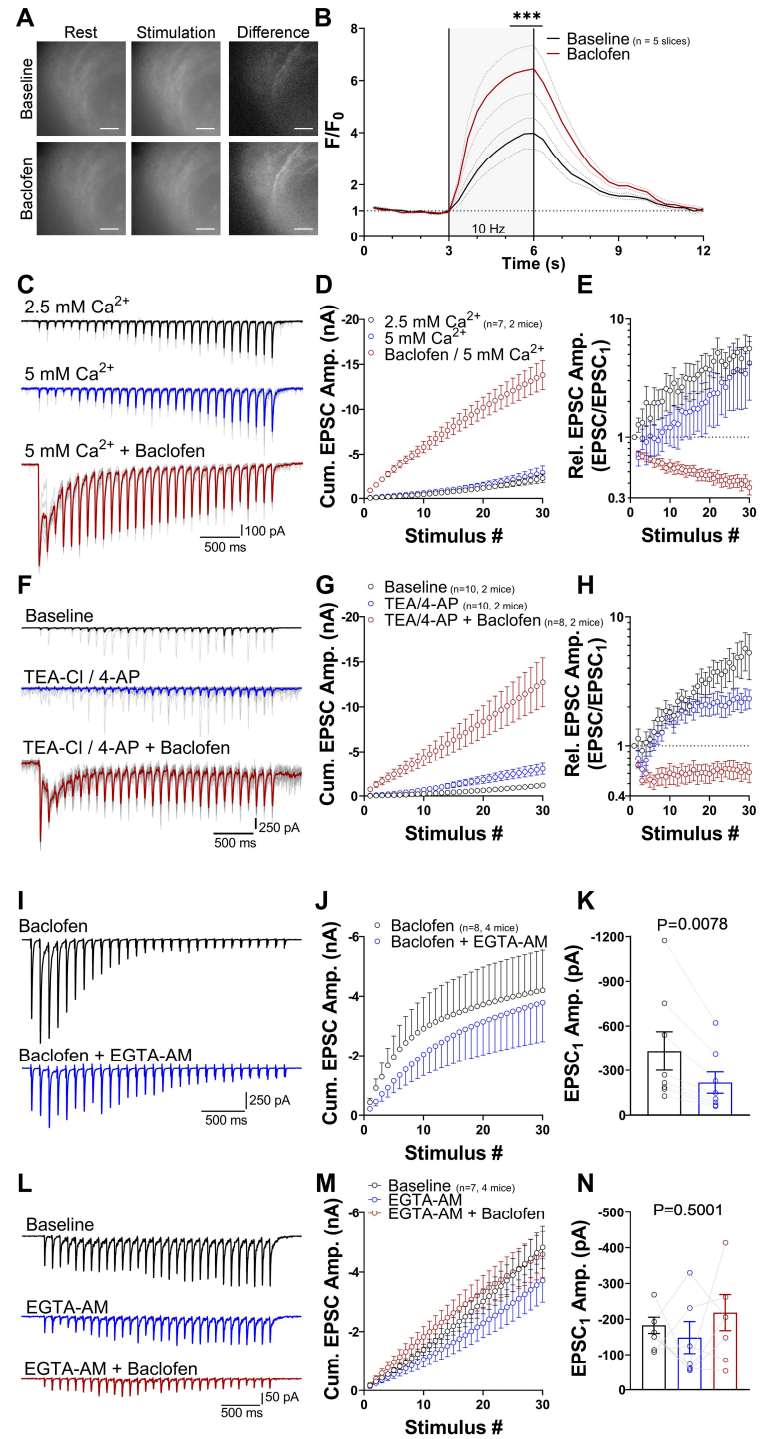

Figure 3

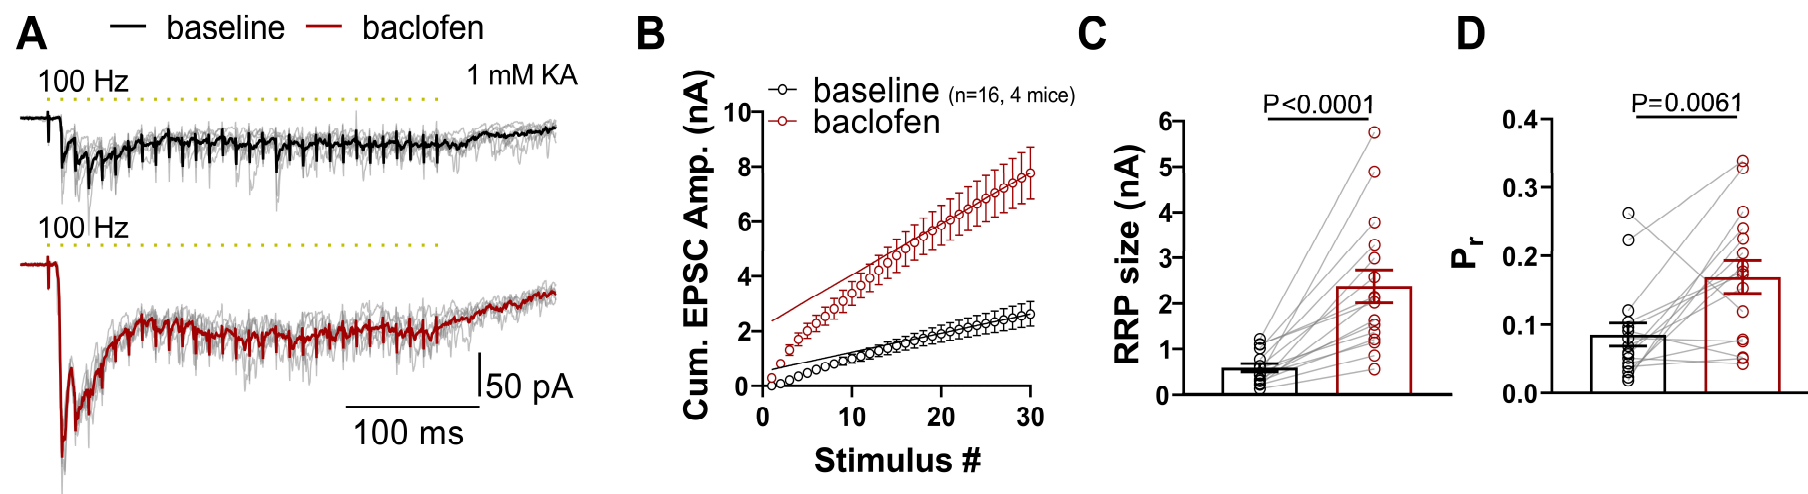

Figure 4

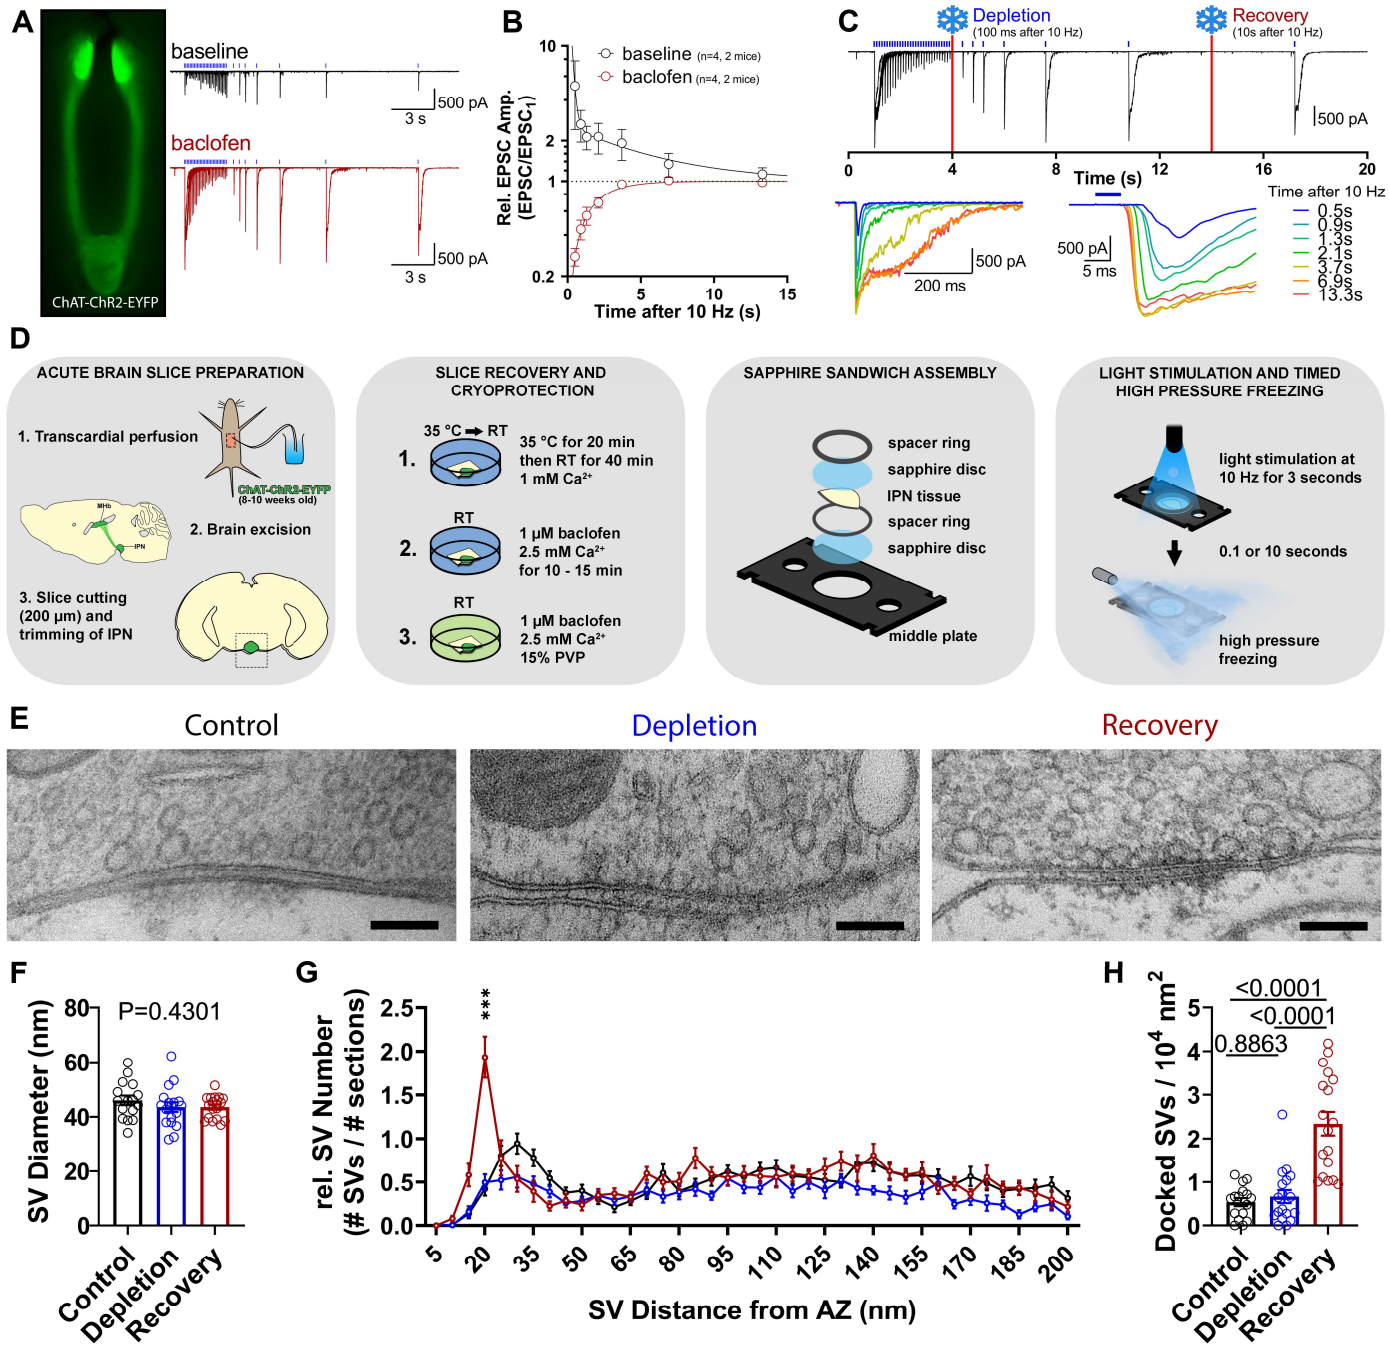

Figure 5

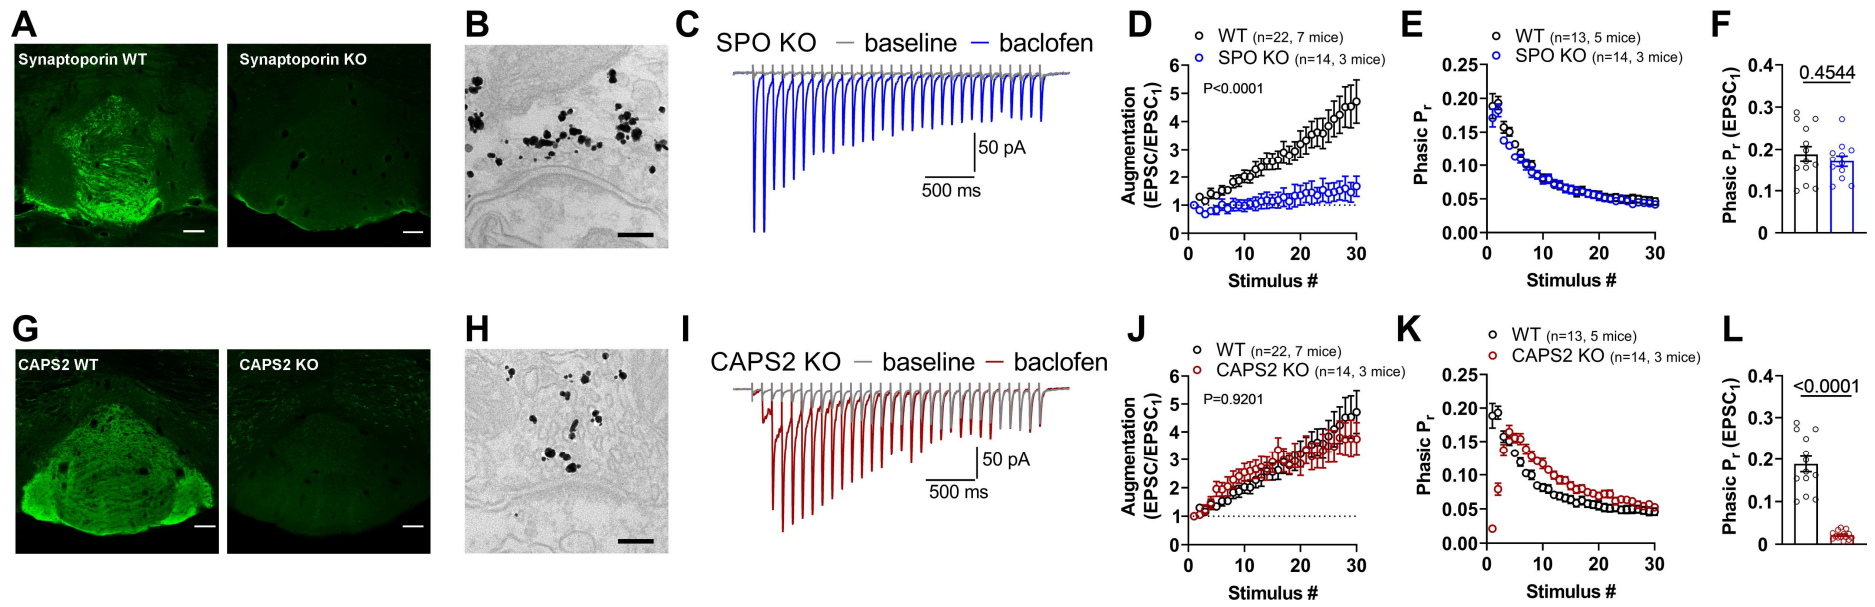

Figure 6

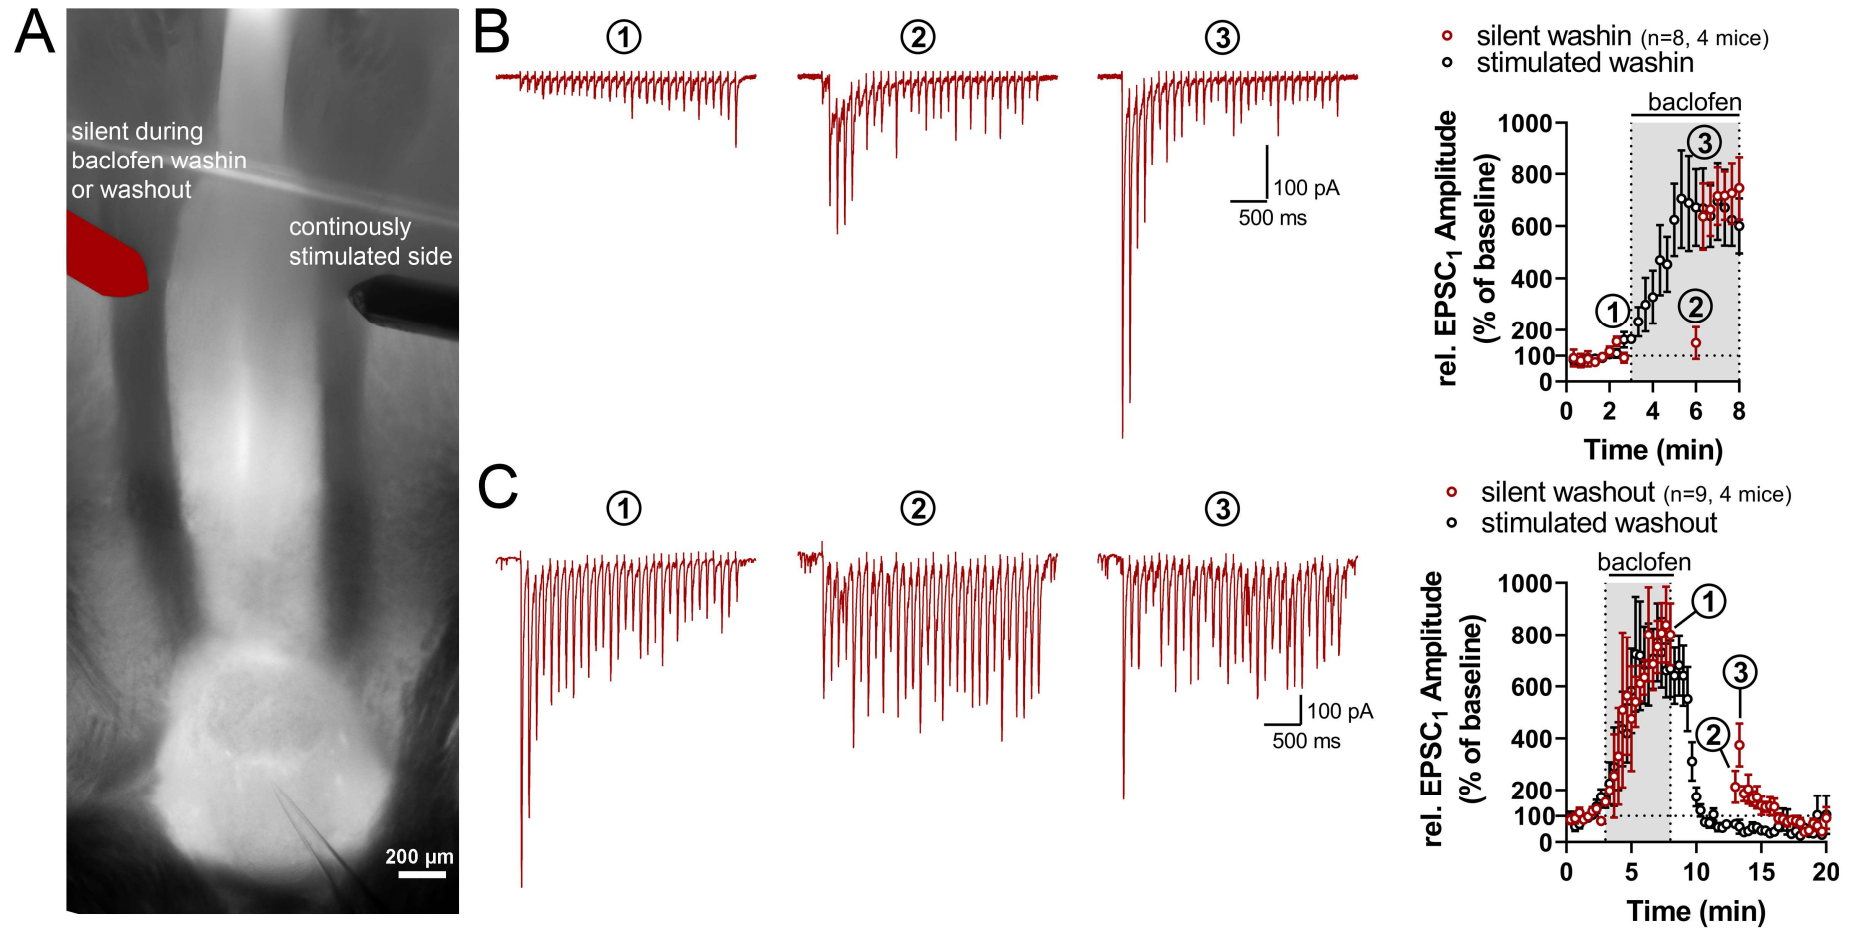

Figure 7

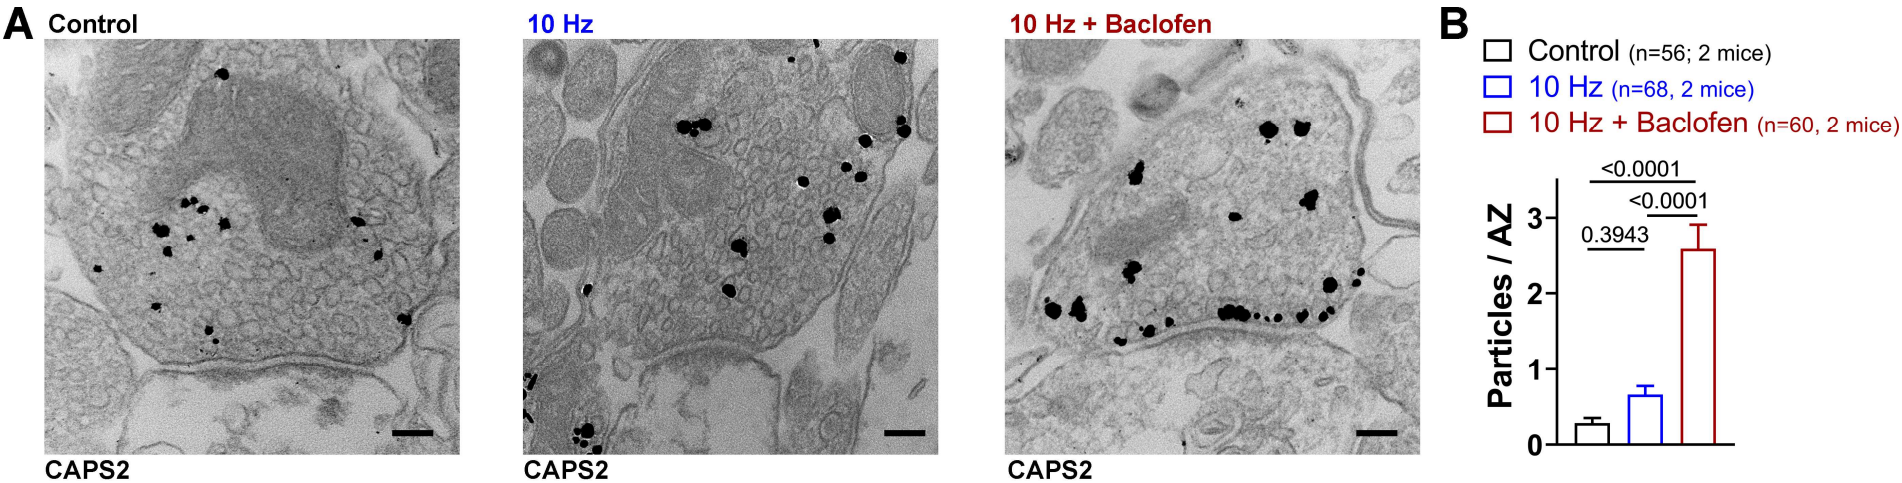

Figure 8

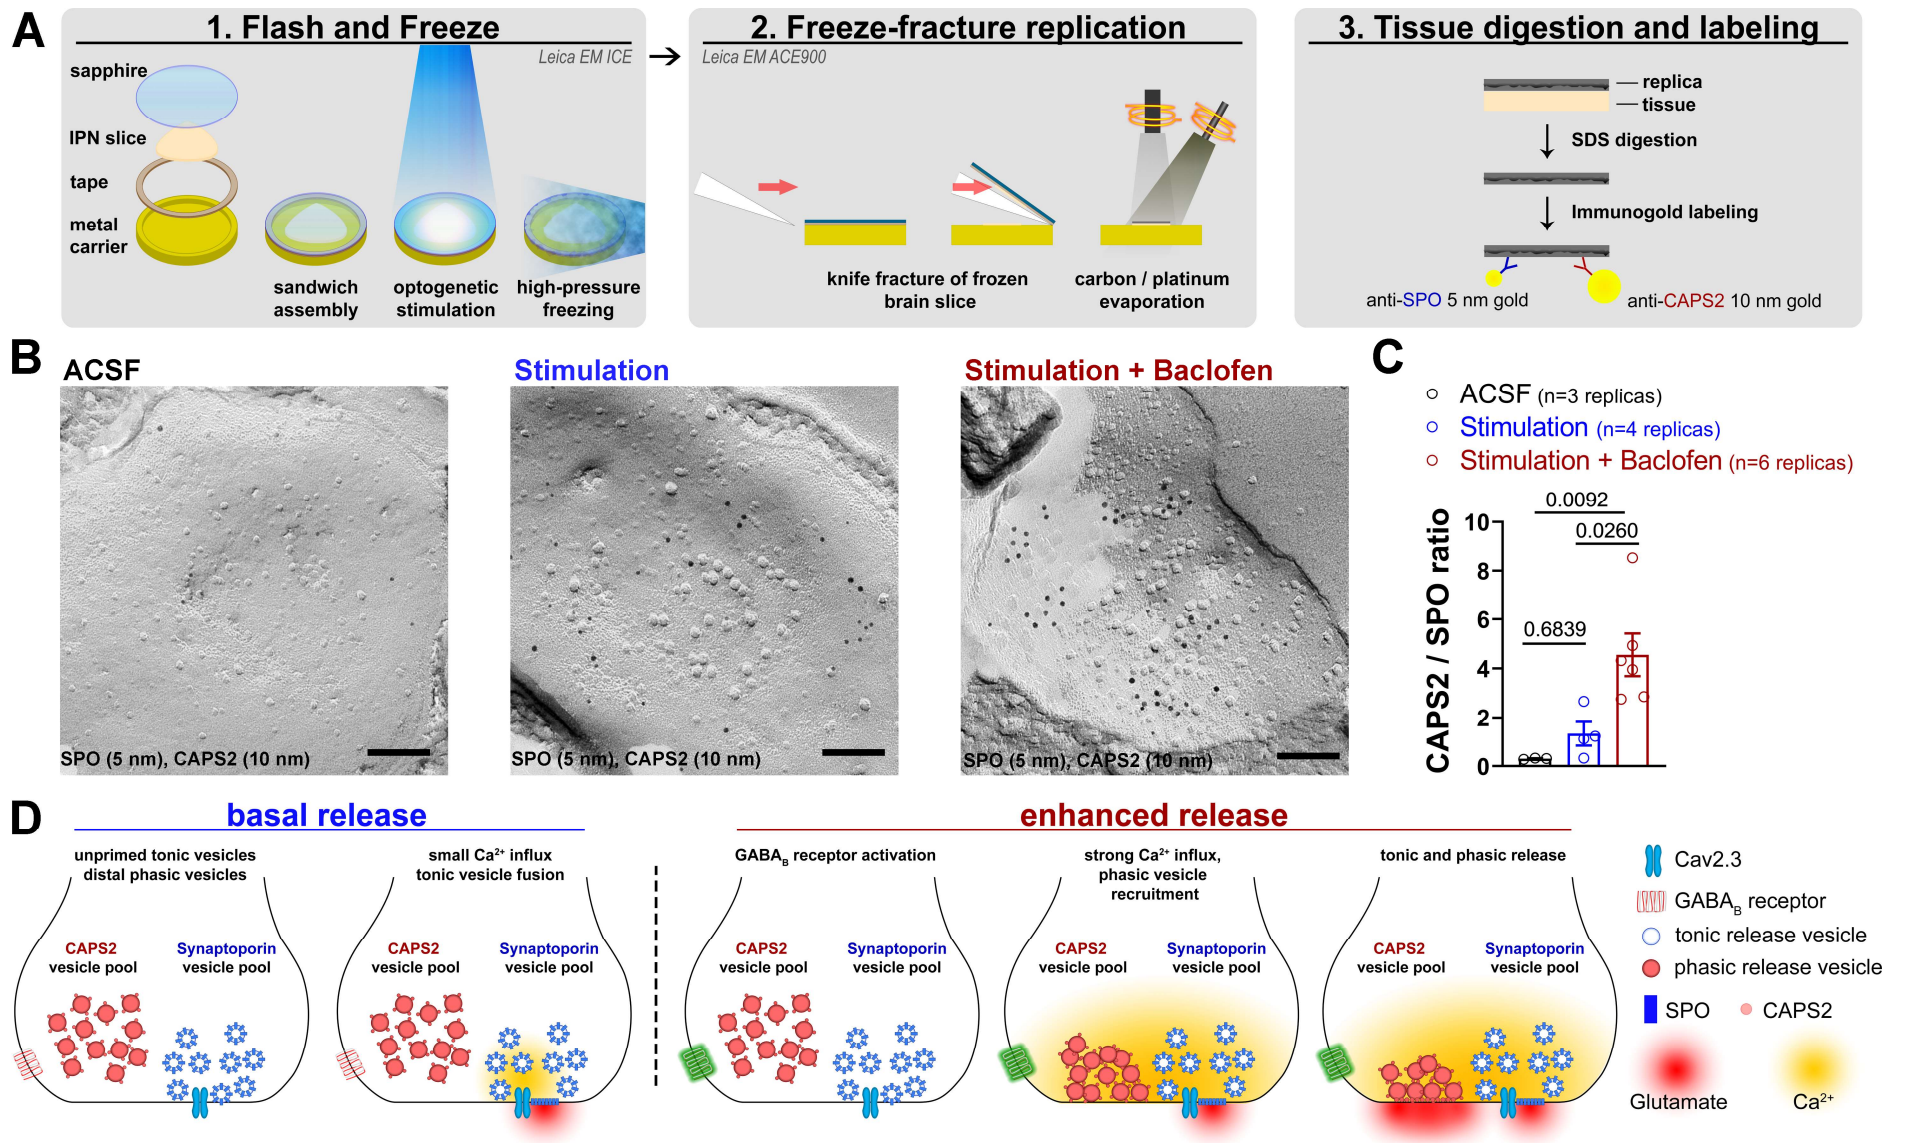

Source: https://www.biorxiv.org/content/biorxiv/early/2022/10/28/2022.10.28.514202.full.pdf
